# Supplementary material for: Photochemical cleavage of leader peptides
Source: Royal Society of Chemistry journal article supplement (doi:10.1039/c0cc02945a), 2010-01-01
Supplement: c0cc02945a.pdf [file c0cc02945a.pdf]

## Supporting Information

### *Photolytic Cleavage of Leader Peptides*

*Noah Bindman, Remco Merckx, Robert Koehler, Nicholas Herrman,  
and Wilfred A. van der Donk\**

Howard Hughes Medical Institute, and Roger Adams Laboratory, Department of  
Chemistry, University of Illinois at Urbana-Champaign, 600 South Mathews Avenue,  
Urbana, IL, 61801

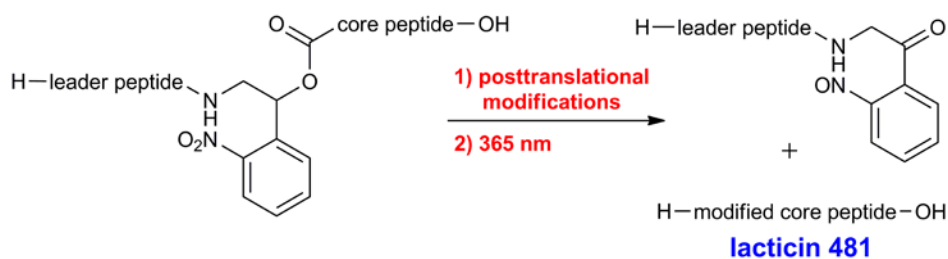

### Table of Contents

|                                                                                      |           |
|--------------------------------------------------------------------------------------|-----------|
| 1. Experimental details for synthesis and characterization of compounds <b>14-17</b> | S2 - S10  |
| 2. Differential Scanning Calorimetry for compounds <b>14-17</b>                      | S11 – S13 |
| 3. Experimental details for peptides <b>18-23</b>                                    | S13 – S16 |
| 4. Mass spectra of <b>21a</b> and <b>23a</b>                                         | S17       |
| 5. HPLC traces of <b>21a-i</b> and <b>23a-i</b>                                      | S17 – S24 |
| 6. Experimental details for lactacin analogs                                         | S24 – S29 |

**Materials.** Fmoc amino acids and resins were purchased from Advanced ChemTech, Novabiochem, or Chem-Impex. HOBt (1-hydroxybenzotriazole) was purchased from Chem-Impex, and DIC (N,N'-diisopropylcarbodiimide) and HCTU (O-(1H-6-chlorobenzotriazol-1-yl)-N,N,N',N'-tetramethyluronium hexafluorophosphate) were purchased from Advanced ChemTech. Solvents commonly used in peptide synthesis and purification, including dimethylformamide (DMF), dichloromethane (DCM) trifluoroacetic acid (TFA), and acetonitrile (MeCN) were obtained in HPLC grade or better and used directly without further purification. Tri-n-butylphosphine, piperidine, and N-methyl morpholine were purchased from Acros whereas pyridine, diisopropylethylamine (DIPEA), and  $\beta$ -mercaptoethanol were purchased from Sigma Aldrich. Tris-(2-carboxyethyl)phosphine (TCEP) was obtained from Molecular Probes as the TCEP-HCl salt. The ligand *tris*-(benzyltriazolylmethyl)amine (TBTA), tetrakis(MeCN)copper(I) hexafluorophosphate and hydrazine were purchased from Sigma Aldrich and 3-butyne-1-amine hydrochloride was purchased from AB Chem Inc. For the synthesis of the photocleavable linker, *p*-toluenesulfonyl chloride, trimethylsilyl chloride, sodium azide, and N-hydroxysuccinimidyl carbonate were purchased from Sigma Aldrich. The irradiation used for photochemical reactions was generated using a UVP Blak-Ray lamp (Ultraviolet Products, San Gabriel, CA) with a 365 nm filter.

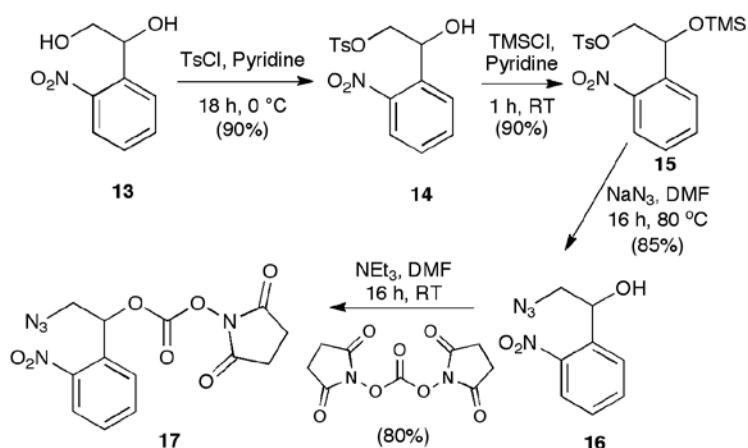

Synthetic design of photolabile linker **17**.

## Experimental:

### 2-Hydroxy-2-(2-nitrophenyl)ethyl 4-methylbenzenesulfonate (**14**):

Into a 50 mL round-bottomed flask was placed *p*-toluenesulfonyl chloride (1.46 g, 7.64 mmol, 1.4 equiv) and 1-(2-nitrophenyl)-1,2-ethanediol **13** (1.0 g, 5.46 mmol, 1 equiv). The flask was then sparged with N<sub>2</sub> for five min. Distilled pyridine (25 mL) was added and the stirred reaction was placed in a 0 °C icebath. The mixture was stirred for 18 h at 0 °C, was allowed to warm to room temperature, and was then quenched with H<sub>2</sub>O (80 mL). Crude product was extracted with Et<sub>2</sub>O (2 × 50 mL) and combined extracts were washed successively with 1 M KHSO<sub>4</sub> (3 × 30 mL), sat. aqueous NaHCO<sub>3</sub> (3 × 30 mL) and sat. aqueous NaCl (2 × 50 mL). The organic layer was dried over MgSO<sub>4</sub>, concentrated by rotary evaporation, and then purified by SiO<sub>2</sub> gel column

chromatography (eluted with hexanes/EtOAc (4:1); R<sub>f</sub> = 0.065) yielding compound **14** (1.65 g, 90%) as an orange oil.

<sup>1</sup>H NMR: (399.947 MHz, CDCl<sub>3</sub>) δ=2.43 (s, 3H, CH<sub>3</sub>), 3.95 (bs, 1H, OH) 4.14 (dd, J = 7.3, 3.2 Hz, 1H, CH<sub>2</sub>), 4.36 (dd, J = 2.7, 7.8 Hz, 1H, CH<sub>2</sub>), 5.51 (dd, J = 2.7, 4.7 Hz, 1H, CH), 7.31 (d, J = 8.1 Hz, 2H, CH<sub>tosyl</sub>), 7.44 (t, J = 7.8 Hz, 1H, CH<sub>phenyl</sub>), 7.65 (t, J = 7.3 Hz, 1H, CH<sub>phenyl</sub>), 7.75 (d, J = 8.3 Hz, 2H, CH<sub>tosyl</sub>), 7.85 (d, J = 7.8 Hz, 1H, CH<sub>phenyl</sub>), 7.95 (d, J = 8.1 Hz, 1H, CH<sub>phenyl</sub>).

<sup>13</sup>C NMR: (100.527 MHz, CDCl<sub>3</sub>) δ=21.9, 67.9, 73.5, 124.9, 128.2, 129.4, 130.3, 132.5, 134.1, 134.4, 145.4, 147.7.

HRMS [M+H]<sup>+</sup> C<sub>15</sub>H<sub>16</sub>NO<sub>6</sub>S calc'd = 338.0698, found = 338.0704.

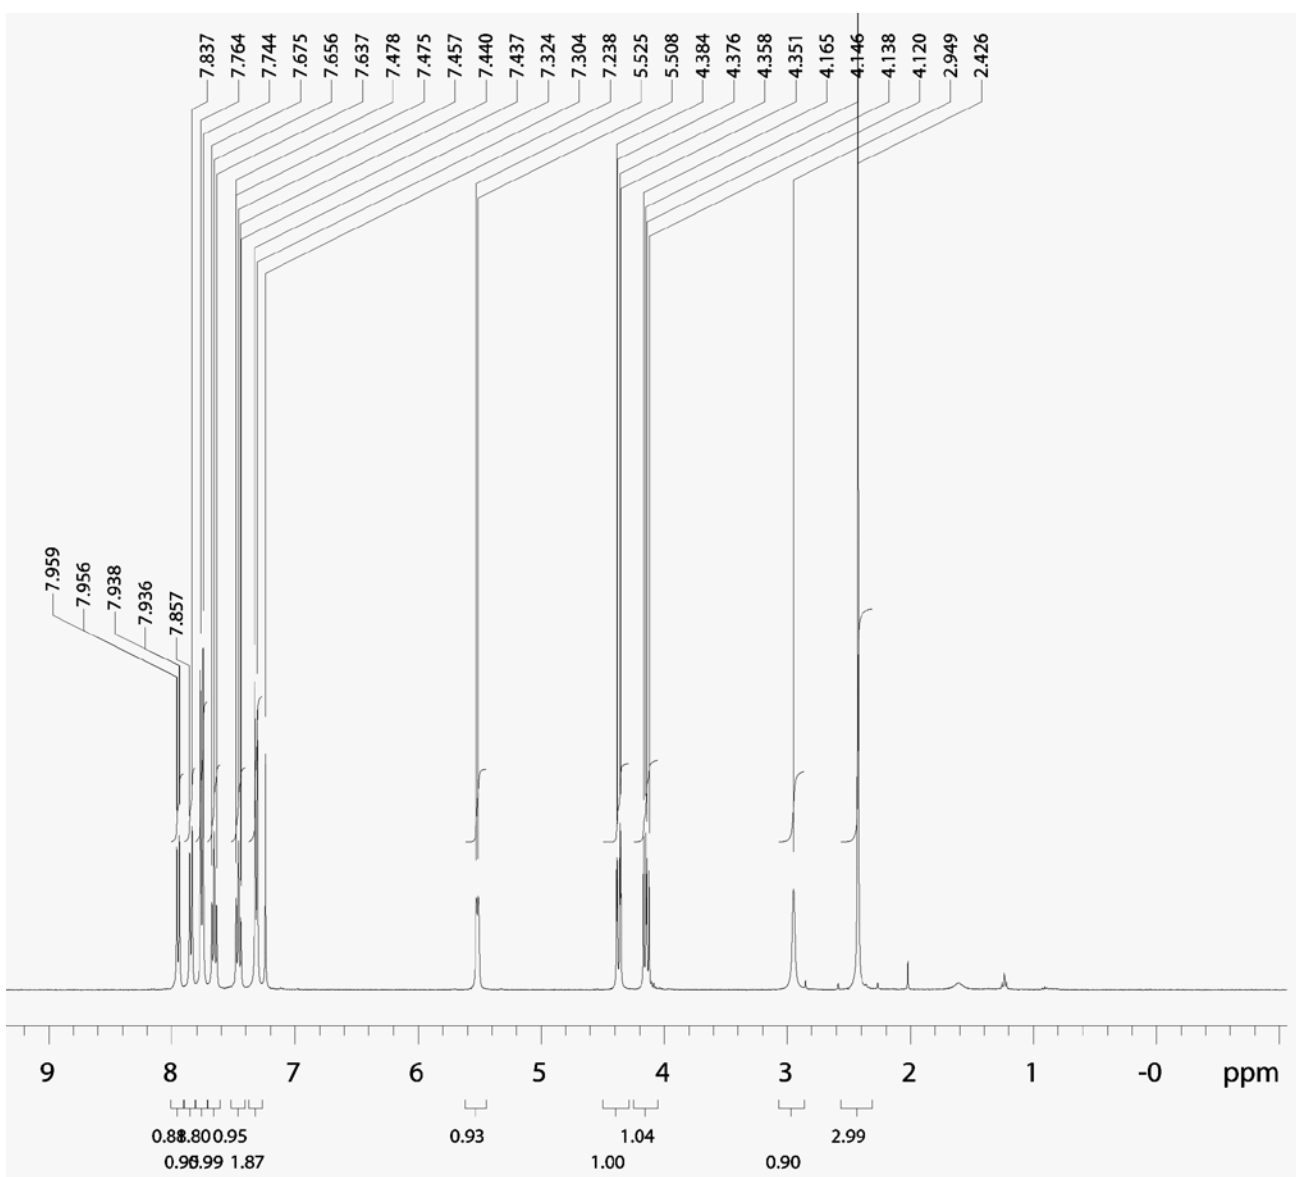

<sup>1</sup>H NMR of **14**.

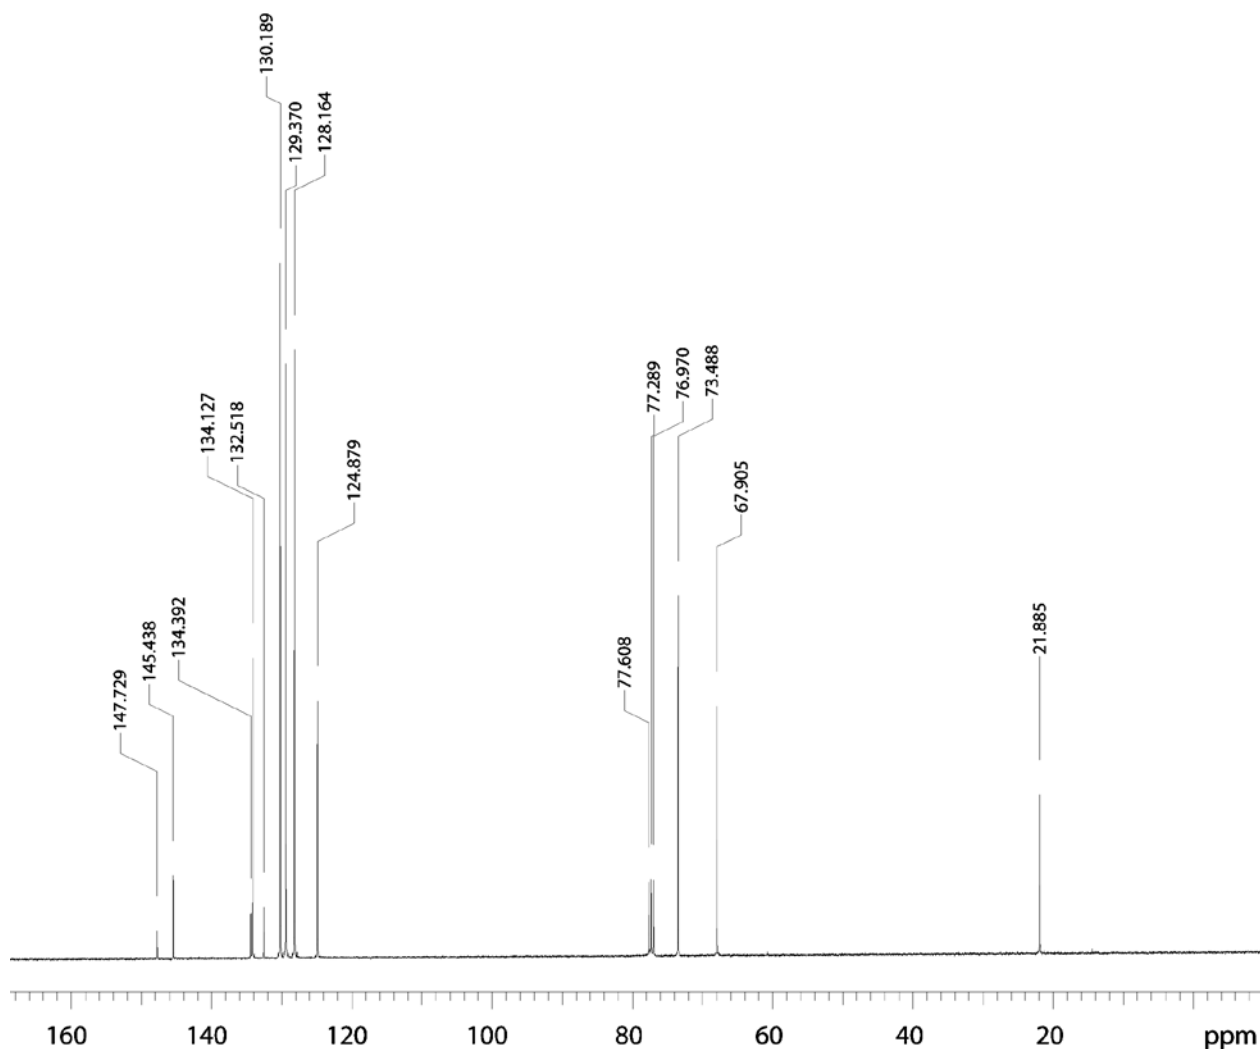

<sup>13</sup>C NMR of **14**.

**2-(2-Nitrophenyl)-2-((trimethylsilyl)oxy)ethyl 4-methylbenzenesulfonate (**15**)**

Into a 50 mL round-bottomed flask was placed a solution of *p*-toluenesulfonyl derivative **14** (1.69 g, 5.0 mmol, 1 equiv). The flask was purged with a nitrogen stream for five min followed by the addition of distilled pyridine (25 mL). To this flask was added TMSCl (2.17 g, 20 mmol, 4 equiv) dropwise and the solution was stirred for 1 h at room temperature. At this time the reaction was quenched with H<sub>2</sub>O (80 mL), crude product was extracted with Et<sub>2</sub>O (2 × 50 mL), and the combined extracts were washed successively with 1 M KHSO<sub>4</sub> (3 × 30 mL), sat. aqueous NaHCO<sub>3</sub> (3 × 30 mL), and sat. aqueous NaCl (2 × 50 mL). The organic layer was dried over MgSO<sub>4</sub> and concentrated by rotary evaporation, yielding compound **15** (1.84 g, 90%) as a tan solid.

$^1\text{H}$  NMR: (399.746 MHz,  $\text{CDCl}_3$ )  $\delta$ =0.01 (s, 9H,  $\text{CH}_3$ ), 2.41 (s, 3H,  $\text{CH}_3$ ), 4.05 (dd,  $J$  = 6.6, 4.4 Hz, 1H,  $\text{CH}_2$ ), 4.16 (dd,  $J$  = 2.9, 6.8 Hz, 1H,  $\text{CH}_2$ ), 5.47 (dd,  $J$  = 6.6, 6.6 Hz, 1H, CH), 7.27 (d,  $J$  = 8.1 Hz, 2H,  $\text{CH}_{\text{tosyl}}$ ), 7.43 (t,  $J$  = 7.8 Hz, 1H,  $\text{CH}_{\text{phenyl}}$ ), 7.61 (t,  $J$  = 7.7 Hz, 1H,  $\text{CH}_{\text{phenyl}}$ ), 7.70 (d,  $J$  = 8.3 Hz, 2H,  $\text{CH}_{\text{tosyl}}$ ), 7.79 (d,  $J$  = 7.9 Hz, 1H,  $\text{CH}_{\text{phenyl}}$ ), 7.89 (d,  $J$  = 8.3 Hz, 1H,  $\text{CH}_{\text{phenyl}}$ ).

$^{13}\text{C}$  NMR: (100.527 MHz,  $\text{CDCl}_3$ )  $\delta$ =-0.02, 21.8, 68.4, 73.7, 124.6, 128.1, 129.1, 129.8, 130.0, 133.1, 133.7, 135.6, 144.9, 147.8.

HRMS  $[\text{M}+\text{Na}]^+$   $\text{C}_{18}\text{H}_{23}\text{N}_6\text{NaSSi}$  calc'd = 432.0913, found = 432.0917.

M.P. = 83-87  $^\circ\text{C}$ .

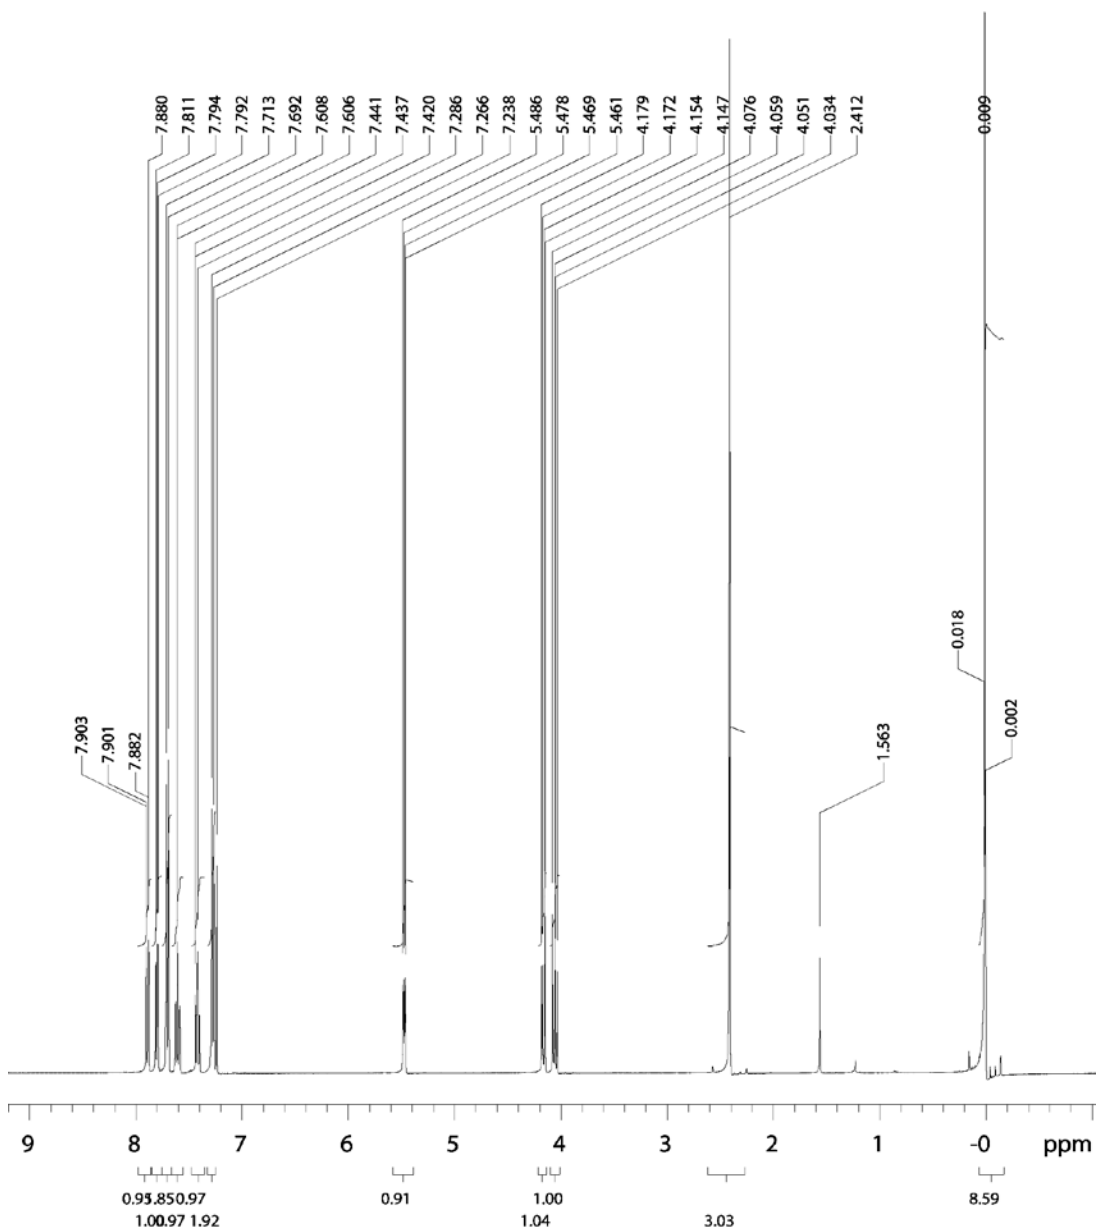

$^1\text{H}$  NMR of **15**.

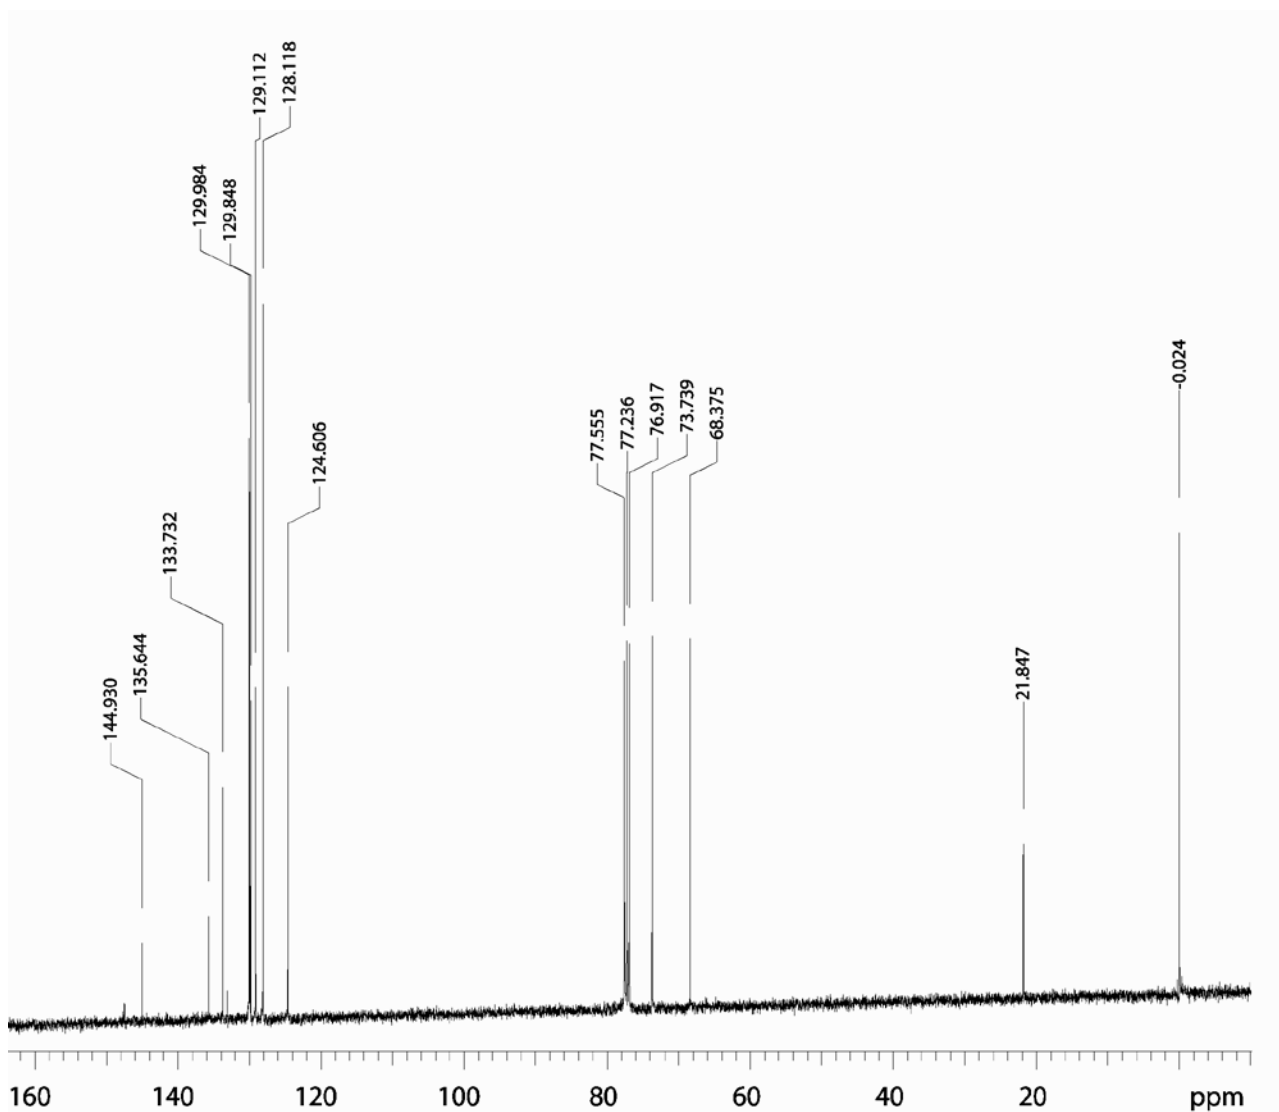

$^{13}\text{C}$  NMR of **15**.

**2-Azido-1-(2-nitrophenyl) ethanol (**16**):**

Into a 25 mL round-bottomed flask was placed sodium azide (0.52 g, 2.52 mmol, 2 equiv). The flask was purged with a nitrogen stream for five min. To this flask was added trimethylsilyl ether derivative **15** (0.52 g, 1.26 mmol, 1 equiv) in DMF (9 mL) and the reaction was stirred at 80 °C for 10 h. At this time the reaction was quenched with H<sub>2</sub>O (80 mL), crude product was extracted with Et<sub>2</sub>O (2 × 50 mL), and the combined extracts were washed with sat. aqueous NaCl (2 × 50 mL). The organic layer was dried with MgSO<sub>4</sub>, concentrated by rotary evaporation, and purified by SiO<sub>2</sub> gel column chromatography (eluted with hexanes/EtOAc (4:1); R<sub>f</sub> = 0.29) yielding **16** (0.23 g, 85%) as a red oil.

$^1\text{H}$  NMR: (399.947 MHz,  $\text{CDCl}_3$ )  $\delta$ =2.64 (d,  $J$  = 3.7 Hz, 1H, OH), 3.44 (dd,  $J$  = 7.6, 4.9 Hz, 1H,  $\text{CH}_2$ ), 3.74 (dd,  $J$  = 3.0, 9.5 Hz, 1H,  $\text{CH}_2$ ), 5.49 (m, 1H, CH), 7.47 (t,  $J$  = 7.8 Hz, 1H,  $\text{CH}_{\text{phenyl}}$ ), 7.69 (t,  $J$  = 8.0 Hz, 1H,  $\text{CH}_{\text{phenyl}}$ ), 7.90 (d,  $J$  = 7.8 Hz, 1H,  $\text{CH}_{\text{phenyl}}$ ), 8.00 (d,  $J$  = 8.3 Hz, 1H,  $\text{CH}_{\text{phenyl}}$ ).

$^{13}\text{C}$  NMR: (100.527 MHz,  $\text{CDCl}_3$ )  $\delta$ =57.4, 69.2, 125.0, 128.8, 129.2, 134.1, 136.3, 147.9.

HRMS  $[\text{M} + \text{Na}]^+ \text{C}_8\text{H}_8\text{N}_4\text{O}_3\text{Na}$  calc'd = 231.0494, found = 231.0483.

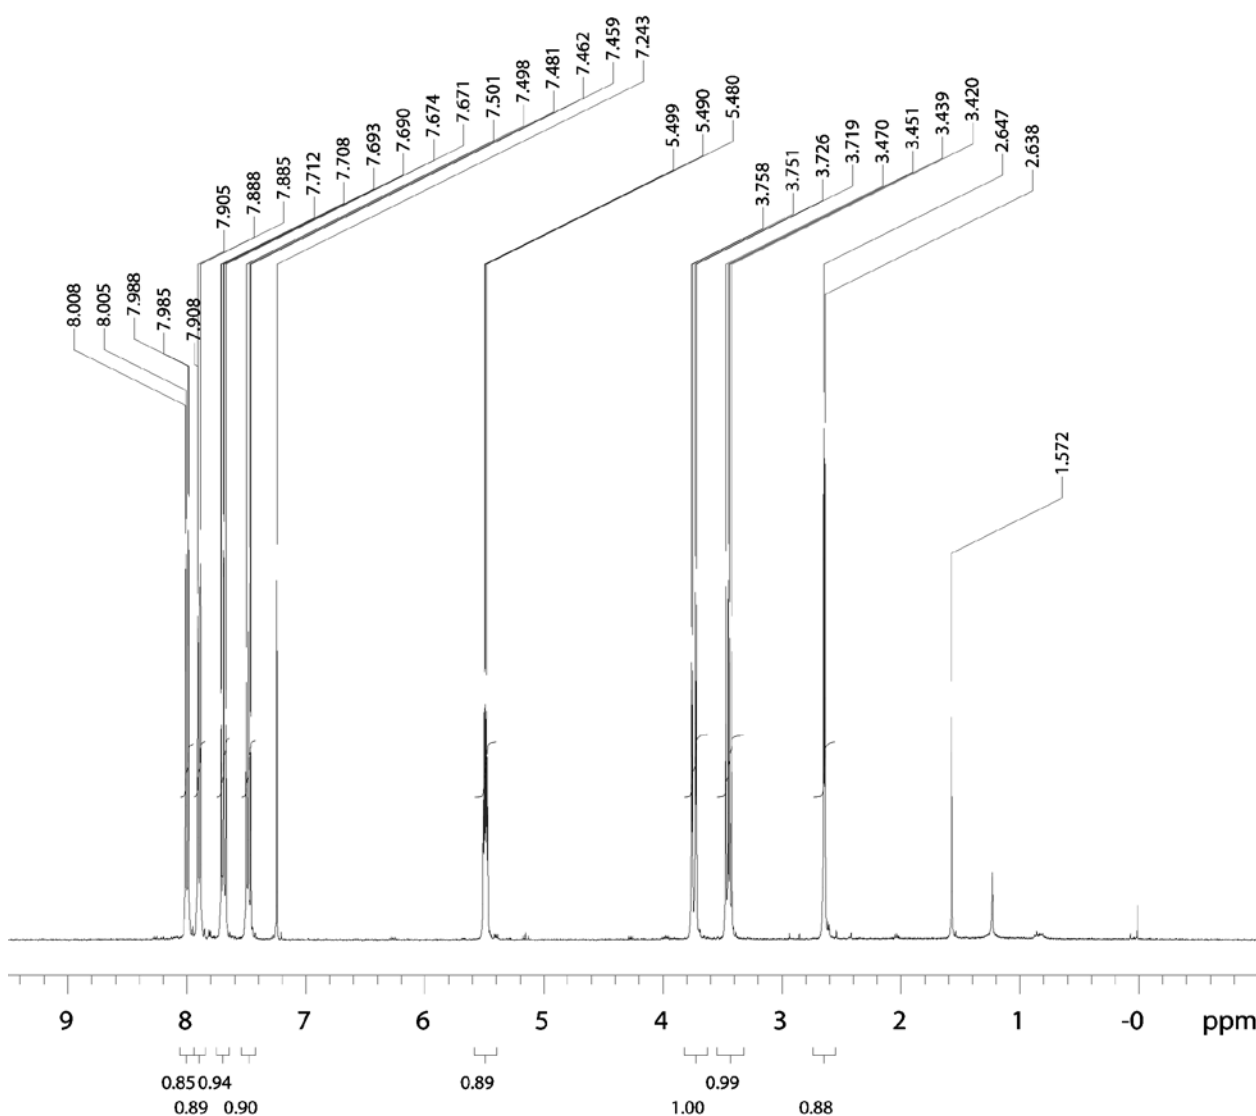

$^1\text{H}$  NMR of **16**.

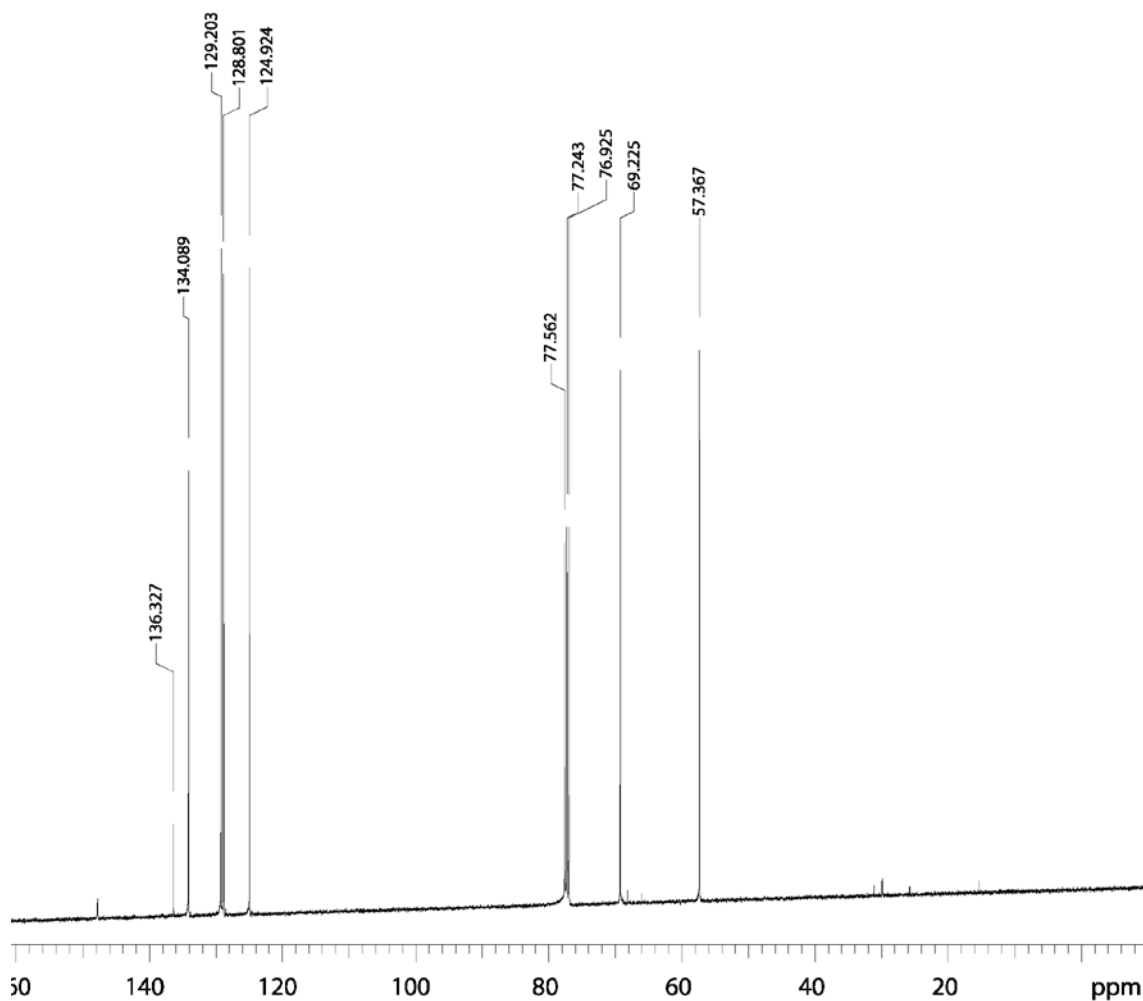

<sup>13</sup>C NMR of **16**.

**2-Azido-1-(2-nitrophenyl)ethyl (2,5-dioxopyrrolidin-1-yl) carbonate (17):**

Into a 10 mL round-bottomed flask was placed a solution of azide derivative **16** (41.6 mg, 0.2 mmol, 1 equiv) in DMF (1.0 mL) and N-hydroxysuccinimidyl carbonate (85.0 mg, 0.33 mmol, 1.65 equiv) was added followed by NEt<sub>3</sub> (83.6 μL, 0.60 mmol, 3 equiv). The reaction was stirred at room temperature for 16 h. At this time, solvent was removed by rotary evaporation and crude product was purified by SiO<sub>2</sub> gel column chromatography (eluted with hexanes/EtOAc (1:1); R<sub>f</sub> = 0.45). Fractions were collected and concentrated by rotary evaporation yielding **17** (55.9 mg, 80% yield) as a white solid.

<sup>1</sup>H NMR: (499.947 MHz, CDCl<sub>3</sub>) δ=2.80 (s, 4H, CH<sub>2</sub>), 3.76 (dd, J = 6.4, 7.1 Hz, 1H, CH<sub>2</sub>), 3.93 (dd, J = 3.0, 10.7 Hz, 1H, CH<sub>2</sub>), 6.46 (dd, J = 3.0, 3.7 Hz, 1H, CH), 7.57 (m, J = 4.3 Hz, 1H, CH<sub>phenyl</sub>), 7.77 (d, J = 4.1 Hz, 2H, CH<sub>phenyl</sub>) 8.11 (d, J = 8.3 Hz, 1H, CH<sub>phenyl</sub>).



$^{13}\text{C}$  NMR: (100.578 MHz,  $\text{CDCl}_3$ )  $\delta$ =25.6, 54.5, 77.8, 125.5, 128.3, 130.4, 131.2, 134.7, 147.5, 150.9, 168.4.

HRMS  $[\text{M}+\text{H}]^+$   $\text{C}_{13}\text{H}_{12}\text{N}_5\text{O}_7$  calc'd = 350.0737, found = 350.0727.

M.P. = 110-115  $^\circ\text{C}$ .

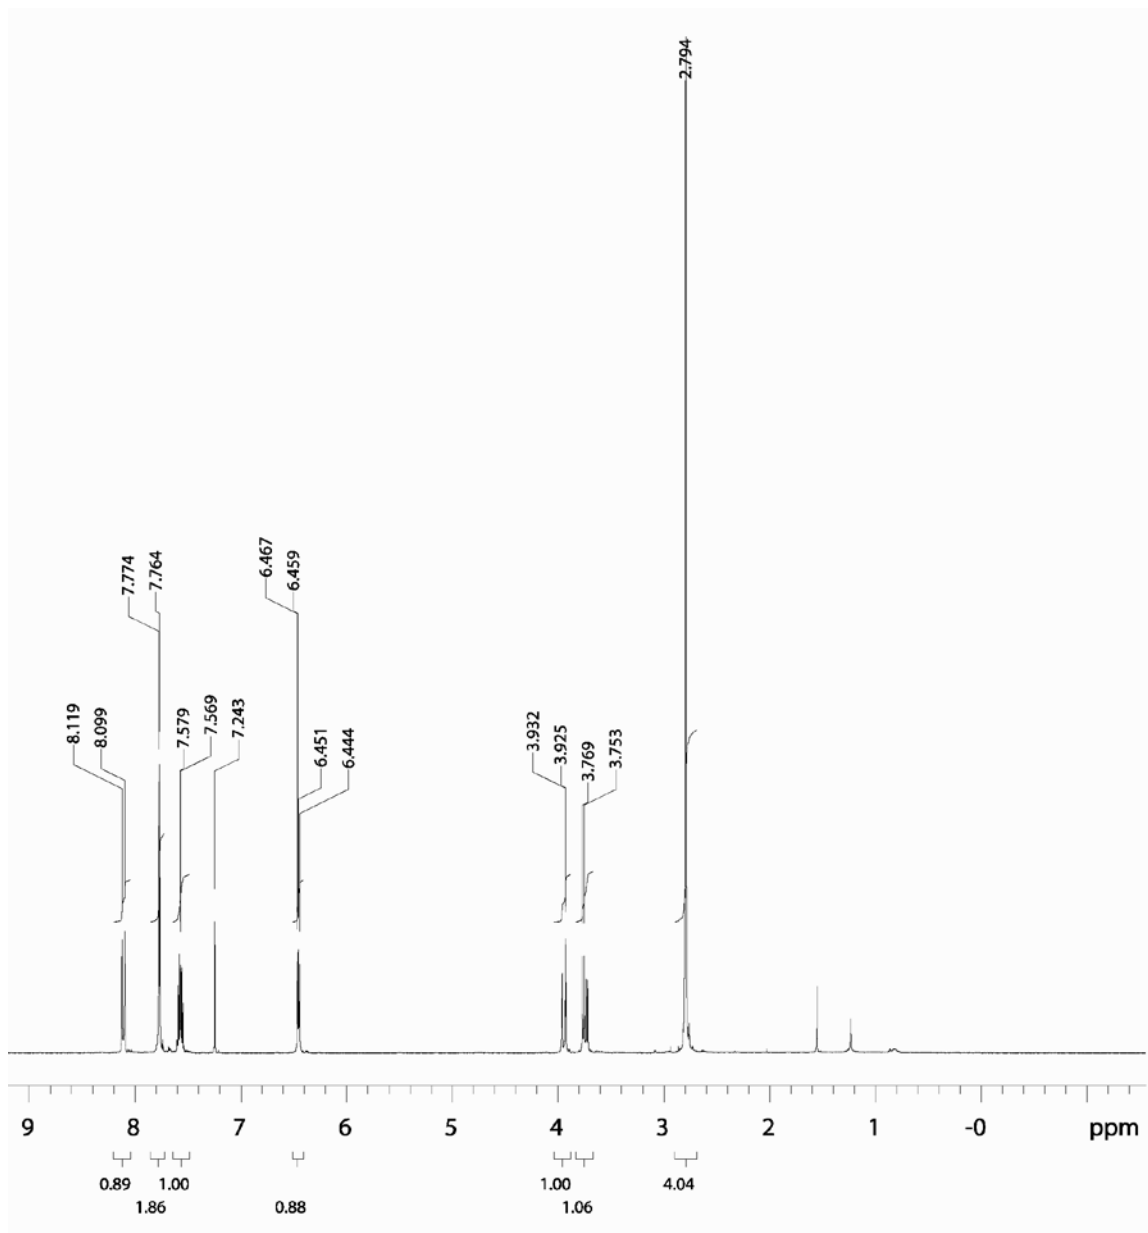

$^1\text{H}$  NMR of **17**.

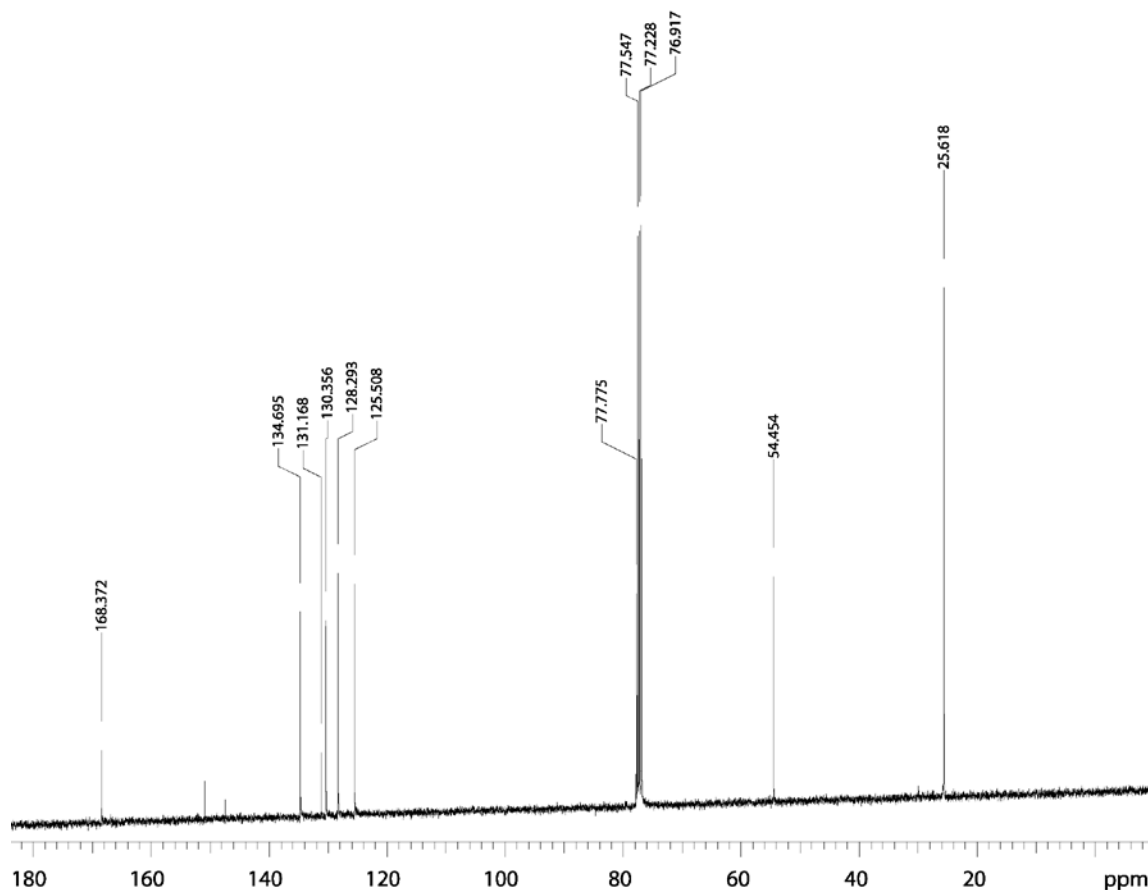

$^{13}\text{C}$  NMR of **17**.

#### Differential Scanning Calorimetry (DSC) of compounds **14-17**.

Because of the large ratio of oxygen and nitrogen atoms to carbon atoms, compounds **14-17** were analyzed by DSC to determine whether they qualify as Class 5 explosives. Each compound was tested in comparison to benzoyl peroxide (BPO) as standard reference material.<sup>1</sup> Briefly, if the heat quantities of the decomposition reactions of compounds **14-17** were found to be lower than the heat quantity of decomposition of BPO then the compound was judged not to be a Class 5 explosive.

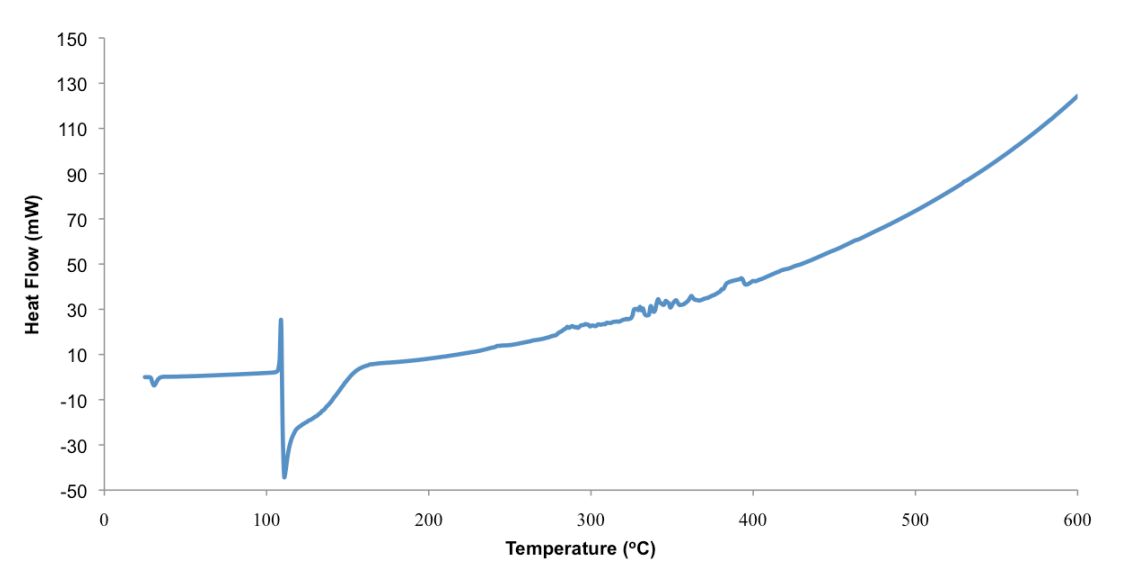

DSC data of standard reference compound BPO. Peak onset = 109 °C, peak = 110 °C, exotherm = -2350 J/g.

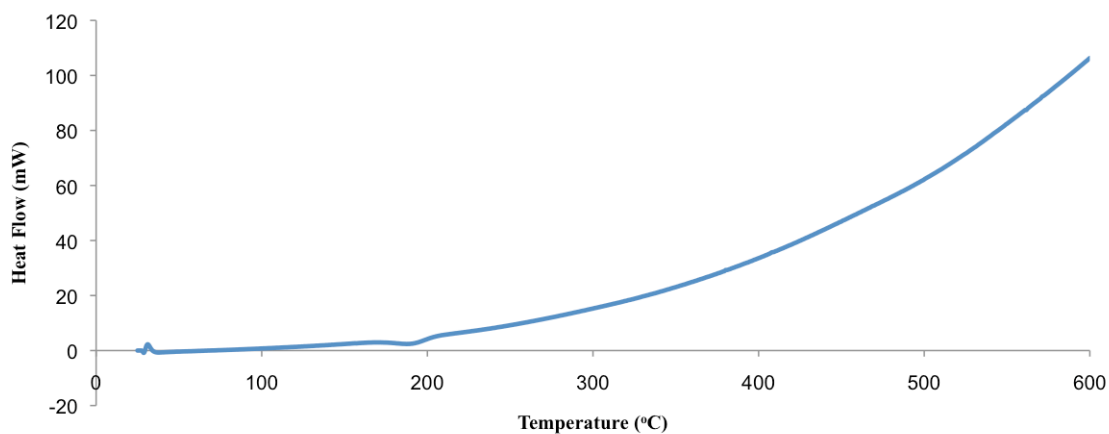

DSC of compound **14**. Peak onset = 170 °C, peak = 191 °C, exotherm = -1220 J/g.

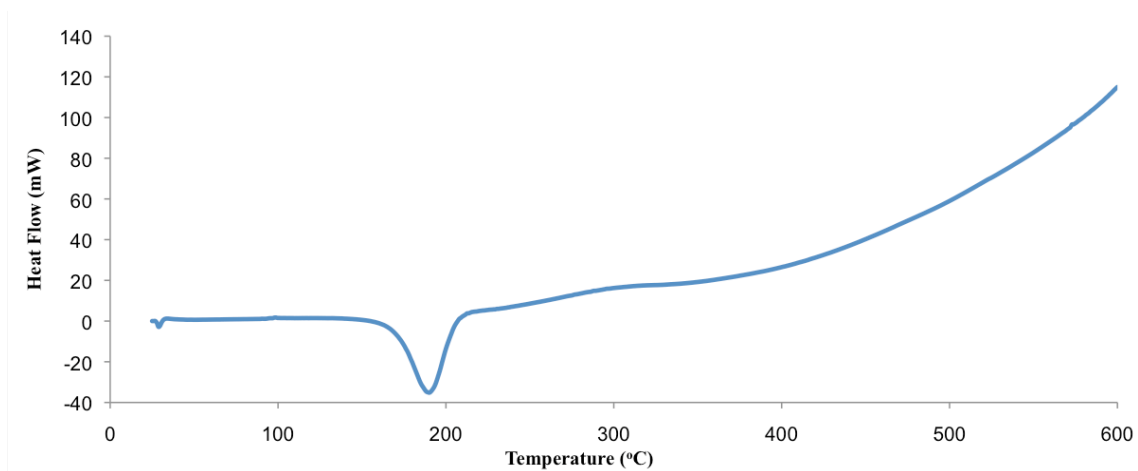

DSC data for compound **15**. Peak onset = 170 °C, peak = 190 °C, exotherm = -860 J/g.

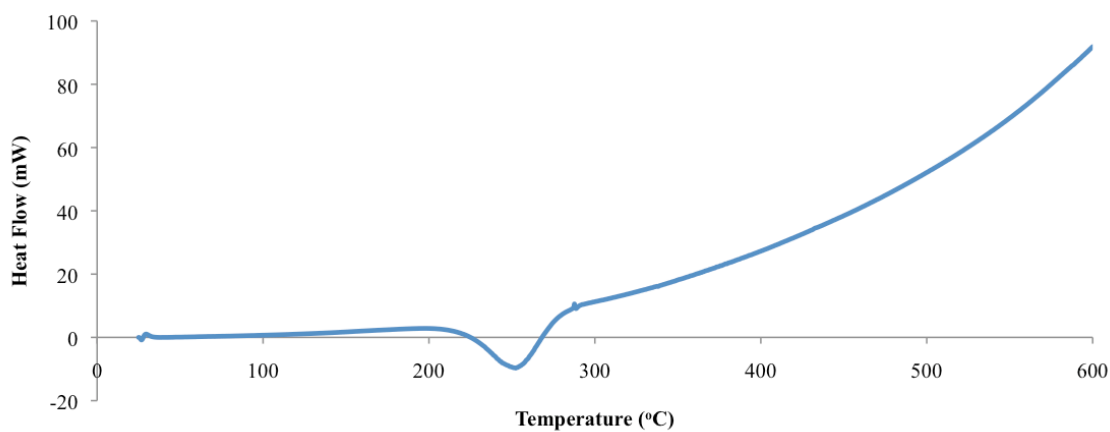

DSC data of compound **16**. Peak onset = 225 °C, peak = 252 °C, exotherm = -1595 J/g.

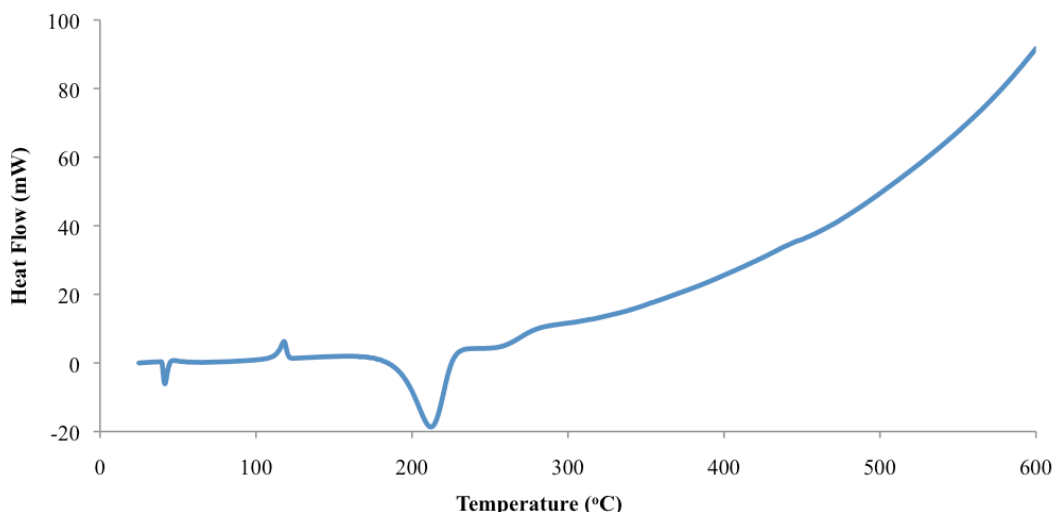

DSC data for compound **17**. Peak onset = 190 °C, peak = 212 °C, exotherm = -1220 J/g.

Each of the compounds tested had heat quantities of decomposition less than that of benzoyl peroxide. However, the baseline of each of the spectra increased dramatically after 250 °C. Therefore, we cannot rule out exotherms at high temperatures that could have been obscured by the baseline. Therefore, care should still be taken before using these compounds at higher temperatures than used in this study and DSC analysis that is accurate at higher temperatures should be employed prior to use at high temperatures.

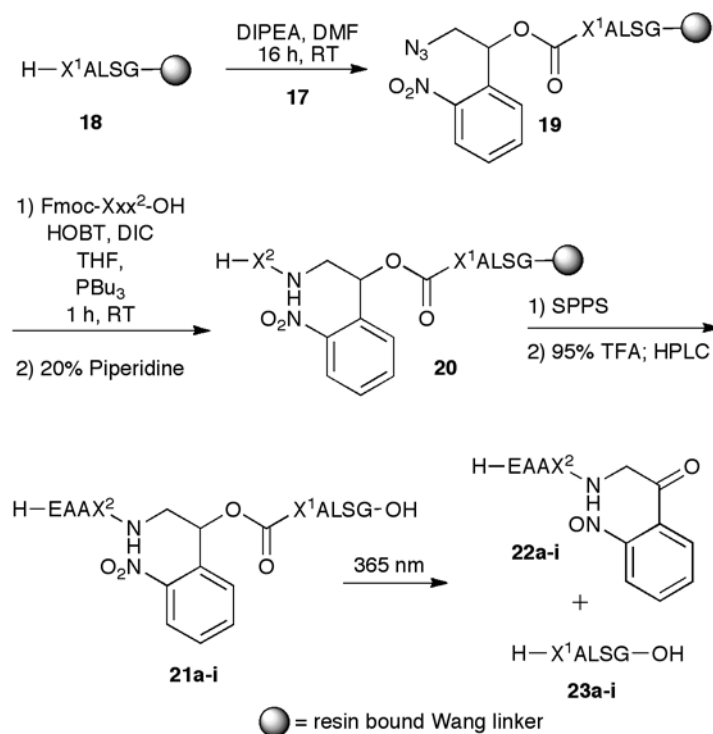

Synthetic scheme for peptides **21a-i** and photocleavage resulting in peptides **22a-i** and **23a-i**.

**General procedure for solid-phase peptide synthesis:**

C-terminal peptides (**18**) were synthesized using standard fluorenylmethyloxycarbonyl (Fmoc) based solid phase peptide synthesis (SPPS) techniques using an automated peptide synthesizer (either Aapptec 396 or Rainin PS3 synthesizers). Preloaded resin (either Wang or 2-chlorotrityl; 0.1 mmol) was first swollen in dimethylformamide (DMF) ( $3 \times 5 \text{ mL} \times 10 \text{ min}$ ). Fmoc-amino acids (0.4 mmol, 4 equiv) were coupled using O-(1H-6-chlorobenzotriazol-1-yl)-N,N,N',N'-tetramethyluronium hexafluorophosphate (HCTU, 165 mg, 0.4 mmol, 4 equiv) as coupling reagent and 0.4 M N-methyl morpholine (NMM) as activating reagent (45 min). Fmoc deprotection was performed with piperidine ( $3 \times 5 \text{ mL} \times 3 \text{ min}$ ; 20% in DMF). After completion of the coupling of the final amino acid, the Fmoc group was removed to create the free amino group.

**Peptide attachment to photocleavable linker (**19**):**

For the synthesis of azidopeptides **19**, pre-swelled resin containing a five-mer peptide (**18**, 0.1 mmol, 1 equiv) was added to a 5 mL round-bottomed flask. To it was added photocleavable linker **17** (70 mg, 0.2 mmol, 2 equiv) dissolved in DMF (3 mL) and the flask was sparged with  $\text{N}_2$  for five min. Diisopropylethylamine (DIEA) (87  $\mu\text{L}$ , 0.5 mmol, 5 equiv) was added and the solution was stirred at room temperature with a non-ridged silica coated stir bar for 12-16 h. At this time, the resin was filtered and washed with DMF ( $3 \times 5 \text{ mL}$ ).

**One pot azide reduction and amino acid coupling (**20**):**

Pre-swelled resin containing the azidopeptide **19** (0.1 mmol, 1 equiv) was added to a 5 mL round-bottomed flask. To this flask was added a solution of various Fmoc protected amino acids (Fmoc-Xxx<sup>2</sup>-OH, 0.4 mmol, 4 equiv), and hydroxybenzotriazole (HOBt) (54 mg, 0.4 mmol, 4 equiv) in THF (3 mL). Diisopropylcarbodiimide (DIC) (62  $\mu\text{L}$ , 0.4 mmol, 4 equiv) was then added followed by the addition of tri-n-butylphosphine (125  $\mu\text{L}$ , 0.5 mmol, 5 equiv). The reaction was stirred at room temperature with a non-ridged silica coated stir bar for 1 h. At this time, the resin was filtered and washed with DMF ( $3 \times 5 \text{ mL}$ ).

**Note:**

The compatibility of the linker with SPPS was first investigated with short peptides with a C-terminal alanine. However, during the reduction step, the C-terminal alanine was epimerized, presumably by the phosphazene base created between tri-n-butylphosphine and azide. This problem could be overcome either by using Gly as the C-terminal residue or by using chlorotrityl resin preloaded with alanine, which did not result in epimerization, presumably due to the steric hindrance of the trityl group on the  $\alpha$  hydrogen of alanine.

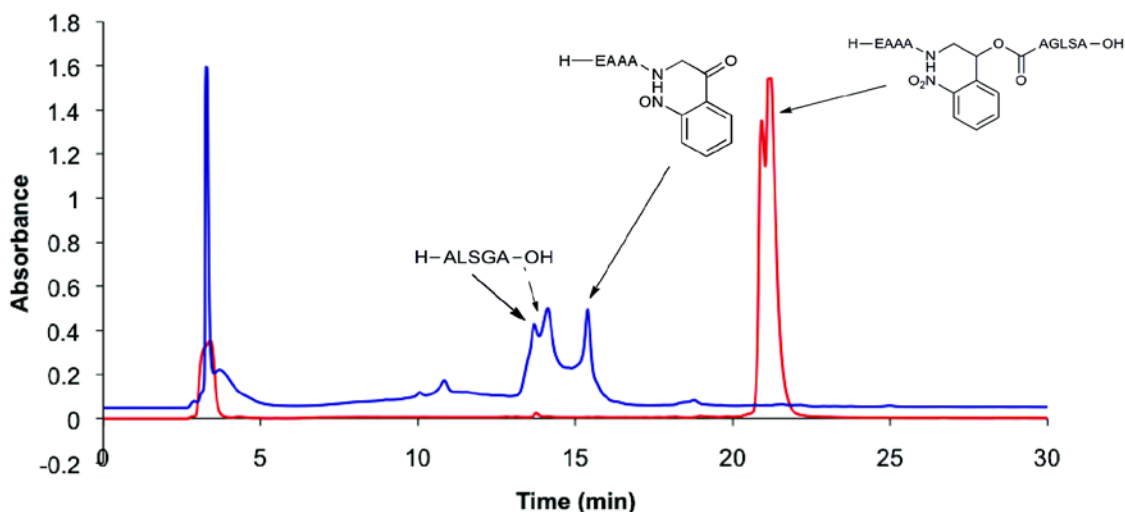

Illustration that after photocleavage of the full peptide with a C-terminal alanine, epimerization of the C-terminal alanine was observed.

#### Extension of the peptide chain:

The final amino acids were added by standard Fmoc based SPPS techniques as described above starting and ending with an Fmoc deprotection.

#### General procedure for peptide cleavage from resin and purification:

Peptides prepared on Wang resin were cleaved from the resin by adding a solution of trifluoroacetic acid (TFA) (5 mL), triisopropylsilane (TIPS) (100  $\mu$ L) and H<sub>2</sub>O (100  $\mu$ L) to the resin (0.1 mmol) and stirring the solution for 2 h at room temperature. The solution was concentrated by purging with a nitrogen stream and peptide was precipitated with cold diethyl ether. The crude peptides were dissolved in an aqueous 0.1% TFA solution, lyophilized, and purified by preparative RP-HPLC on a Waters Delta-Pak<sup>TM</sup> C18 column (2.5 cm  $\times$  10.0 cm) employing a water-acetonitrile solvent system. A linear gradient was used from 2% to 80% solvent B over 45 min (solvent A = 0.1% TFA in H<sub>2</sub>O; solvent B = 80% acetonitrile in H<sub>2</sub>O, 0.086% TFA). Peptides were monitored by their absorbance at 220 nm. Fractions containing product **21a-i** as analyzed by matrix assisted laser desorption ionization (MALDI) or electrospray ionization (ESI) mass spectrometry were collected, lyophilized, and weighed to determine yield.

#### Note:

The linker contains a stereogenic center and was prepared in racemic form, resulting in two diastereomers of peptides **21a-i** (as seen in Figure 1).

**H—EAAA—Linker—TALSG—OH (21a).** RP-HPLC;  $R_t$  = 20.2-21.4 min. LRMS (ESI): calcd C<sub>41</sub>H<sub>63</sub>N<sub>11</sub>O<sub>18</sub>, [M+H]<sup>+</sup> 998.4, observed 998.1.

**H—EAAA—Linker—VALSG—OH (21b).** RP-HPLC;  $R_t$  = 23.0-24.0 min. LRMS (ESI): calcd C<sub>42</sub>H<sub>65</sub>N<sub>11</sub>O<sub>17</sub>, [M+H]<sup>+</sup> 996.4, observed 996.1.

**H—EAAA—Linker—KALSG—OH (21c).** RP-HPLC;  $R_t$  = 19.2-20.6 min. LRMS (MALDI): calcd C<sub>43</sub>H<sub>68</sub>N<sub>12</sub>O<sub>17</sub>, [M+H]<sup>+</sup> 1025.5, observed 1027.3.

**H—EAAG—Linker—GALSG—OH (21d).** RP-HPLC;  $R_t$  = 19.7-21.0 min. LRMS

(ESI): calcd C<sub>38</sub>H<sub>57</sub>N<sub>11</sub>O<sub>17</sub>, [M+H]<sup>+</sup> 940.4, observed 940.1.

**H—EAAL—Linker—LALSG—OH (21e).** RP-HPLC; Rt = 28.0-29.2 min. LRMS (MALDI): calcd C<sub>46</sub>H<sub>73</sub>N<sub>11</sub>O<sub>17</sub>, [M+H]<sup>+</sup> 1052.5, observed 1052.9.

**H—EAAY—Linker—YALSG—OH (21f).** RP-HPLC; Rt = 23.6-25.0 min. LRMS (MALDI): calcd C<sub>52</sub>H<sub>69</sub>N<sub>11</sub>O<sub>19</sub>, [M+H]<sup>+</sup> 1152.5, observed 1152.9.

**H—EAAP—Linker—PALSG—OH (21g).** RP-HPLC; Rt = 22.0-23.9 min. LRMS (MALDI): calcd C<sub>44</sub>H<sub>65</sub>N<sub>11</sub>O<sub>17</sub>, [M+H]<sup>+</sup> 1020.5, observed 1021.2.

**H—EAAW—Linker—WALSG—OH (21h).** RP-HPLC; Rt = 29.9-31.2 min. LRMS (MALDI): calcd C<sub>56</sub>H<sub>71</sub>N<sub>13</sub>O<sub>17</sub>, [M+H]<sup>+</sup> 1198.5, observed 1199.4.

**H—EAAE—Linker—EALSG—OH (21i).** RP-HPLC; Rt = 19.0-20.2 min. LRMS (MALDI): calcd C<sub>44</sub>H<sub>65</sub>N<sub>11</sub>O<sub>21</sub>, [M+H]<sup>+</sup> 1084.4, observed 1085.7.

### General procedure for photocleavage of the polypeptide backbone:

A solution of peptide **21a-i** (4-20 mg), dissolved in 0.1% TFA (1.0-2.0 mL) was placed into a 5 mL round-bottomed flask. The solution was irradiated at 365 nm for 1-2 h (until starting material had disappeared as shown by MALDI-MS). The crude material was then purified by preparative RP-HPLC on a C18 column employing a water-acetonitrile solvent system. Peptides were monitored by their absorbance at 220 nm. Fractions containing product **23a-i** (as analyzed by ESI-MS) were collected, lyophilized, and weighed to determine the yield.

**H—TALSG—OH (23a).** Analytical RP-HPLC; Rt = 10.8-12.0 min. LRMS (ESI): calcd C<sub>18</sub>H<sub>33</sub>N<sub>5</sub>O<sub>8</sub>, [M+H]<sup>+</sup> 448.2, observed 448.0.

**H—VALSG—OH (23b).** Analytical RP-HPLC; Rt = 13.2-14.4 min. LRMS (ESI): calcd C<sub>19</sub>H<sub>35</sub>N<sub>5</sub>O<sub>7</sub>, [M+H]<sup>+</sup> 446.3, observed 446.1.

**H—KALSG—OH (23c).** Analytical RP-HPLC; Rt = 10.1-11.0 min. LRMS (ESI): calcd C<sub>20</sub>H<sub>38</sub>N<sub>6</sub>O<sub>7</sub>, [M+H]<sup>+</sup> 475.3, observed 475.1.

**H—GALSG—OH (23d).** Analytical RP-HPLC Rt = 11.2-12.2 min. LRMS (ESI): calcd C<sub>16</sub>H<sub>29</sub>N<sub>5</sub>O<sub>7</sub>, [M+H]<sup>+</sup> 404.2, observed 404.0.

**H—LALSG—OH (23e).** Analytical RP-HPLC Rt = 16.2-17.1 min. LRMS (ESI): calcd C<sub>20</sub>H<sub>37</sub>N<sub>5</sub>O<sub>7</sub>, [M+H]<sup>+</sup> 460.3, observed 460.1.

**H—YALSG—OH (23f).** Analytical RP-HPLC Rt = 14.7-15.8 min. LRMS (ESI): calcd C<sub>23</sub>H<sub>35</sub>N<sub>5</sub>O<sub>8</sub>, [M+H]<sup>+</sup> 510.3, observed 510.1.

**H—PALSG—OH (23g).** Analytical RP-HPLC Rt = 11.9-13.0 min. LRMS (ESI): calcd C<sub>19</sub>H<sub>33</sub>N<sub>5</sub>O<sub>7</sub>, [M+H]<sup>+</sup> 444.2, observed 444.0.

**H—WALSG—OH (23h).** Analytical RP-HPLC Rt = 19.4-20.4 min. LRMS (ESI): calcd C<sub>25</sub>H<sub>36</sub>N<sub>6</sub>O<sub>7</sub>, [M+H]<sup>+</sup> 533.3, observed 533.1.

**H—EALSG—OH (23i).** Analytical RP-HPLC Rt = 11.5-12.5 min. LRMS (ESI): calcd C<sub>19</sub>H<sub>33</sub>N<sub>5</sub>O<sub>9</sub>, [M+H]<sup>+</sup> 476.3, observed 476.1.



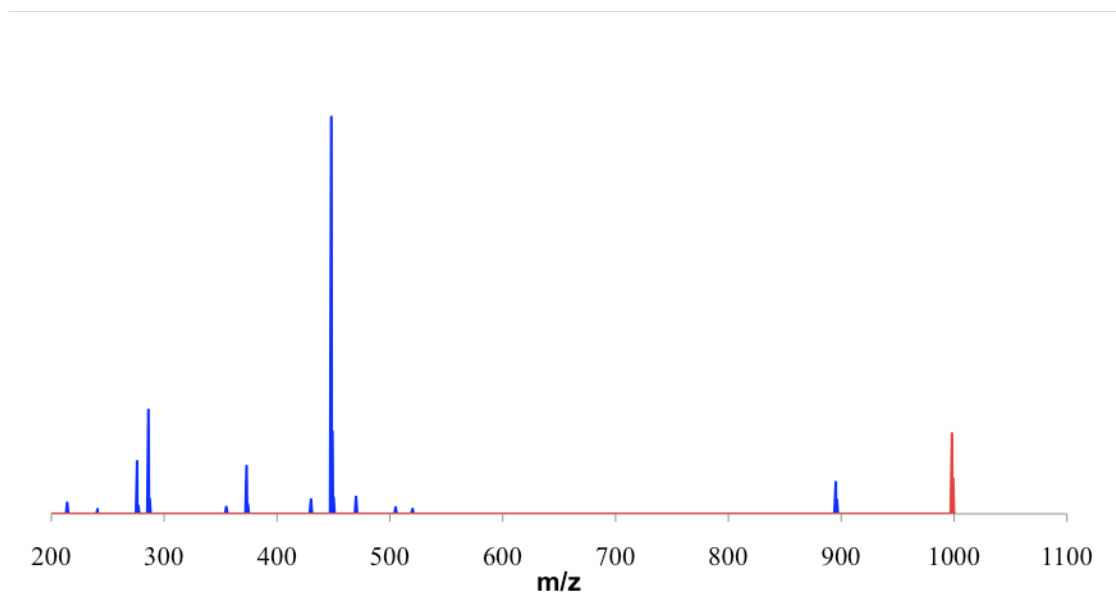

**Figure S1.** ESI-MS of **21a** before (red) and after (blue) photochemical reaction.  $[M+H]^+_{\text{before}} = 998.1$ ,  $[M+H]^+_{\text{after}} = 448.2$ .

**Representative HPLC traces of peptides 21a-i before (red) and after (blue) the photocleavage reaction:** (Grace Vydac® C18 column (4.6 x 250 mm); a linear gradient was used from 2% to 80% solvent B over 45 min (solvent A = 0.1% TFA in H<sub>2</sub>O; solvent B = 80% acetonitrile in H<sub>2</sub>O, 0.086% TFA))

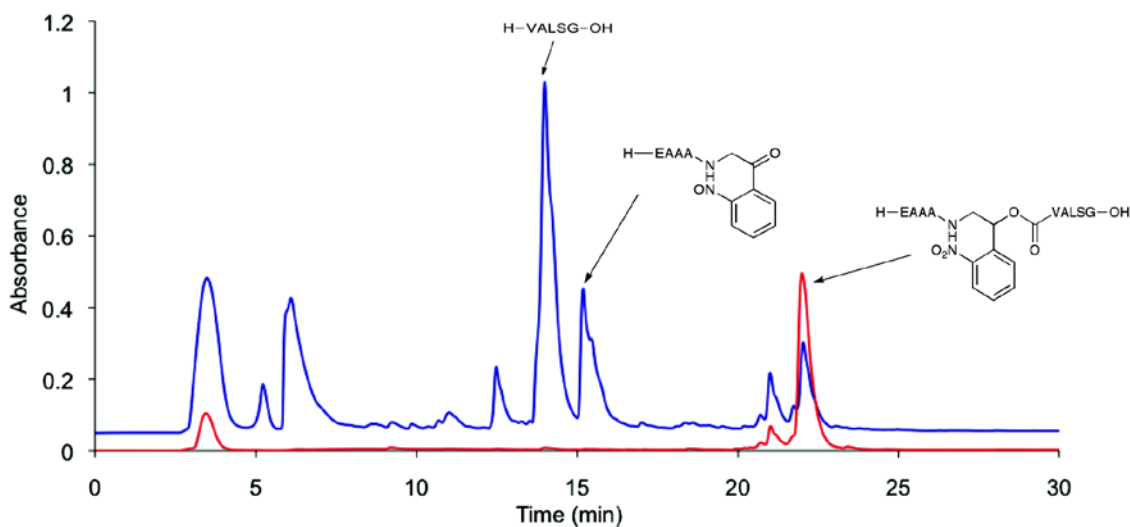

**Figure S2.** Photocleavage of **21b** to generate **22b** and **23b**.

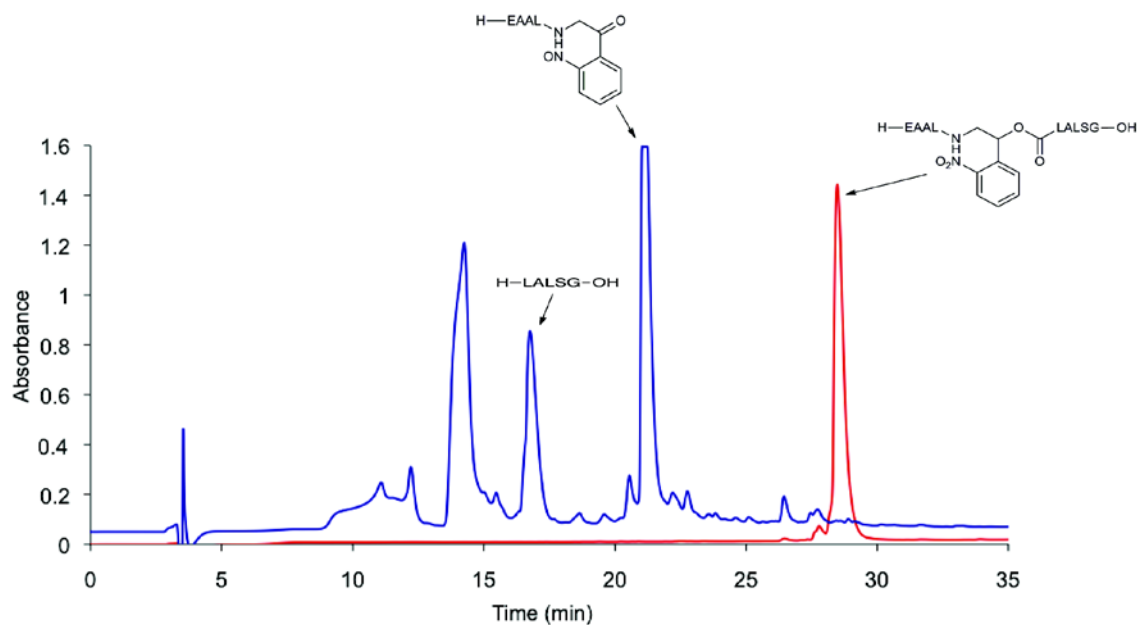

**Figure S3.** Photocleavage of **21e** to produce **22e** and **23e**.

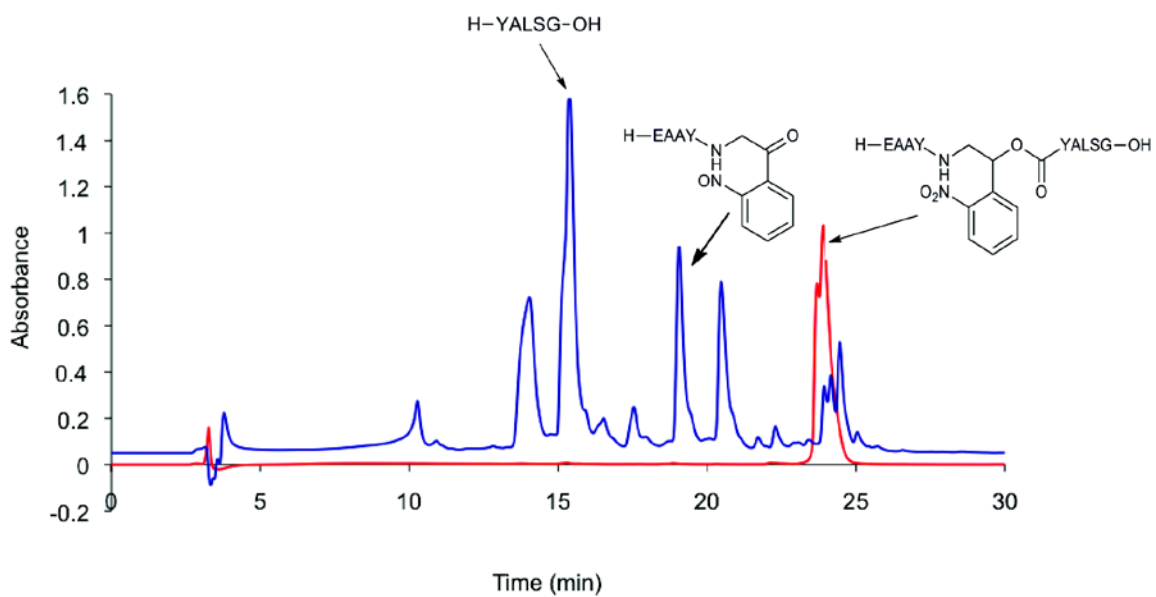

**Figure S4.** Photocleavage of **21f** to furnish **22f** and **23f**.

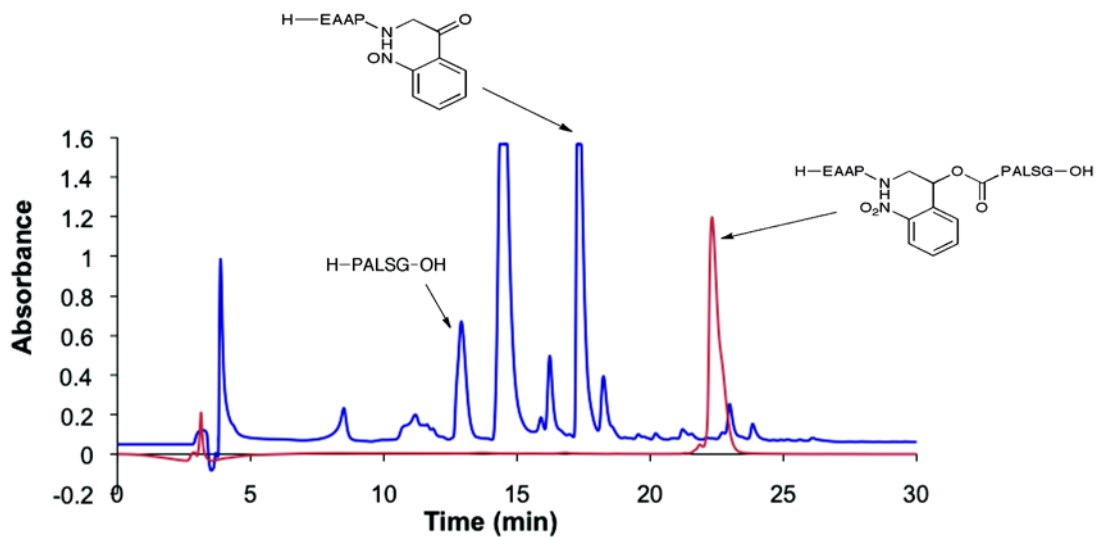

**Figure S5.** Photocleavage of **21g** to produce **22g** and **23g**.

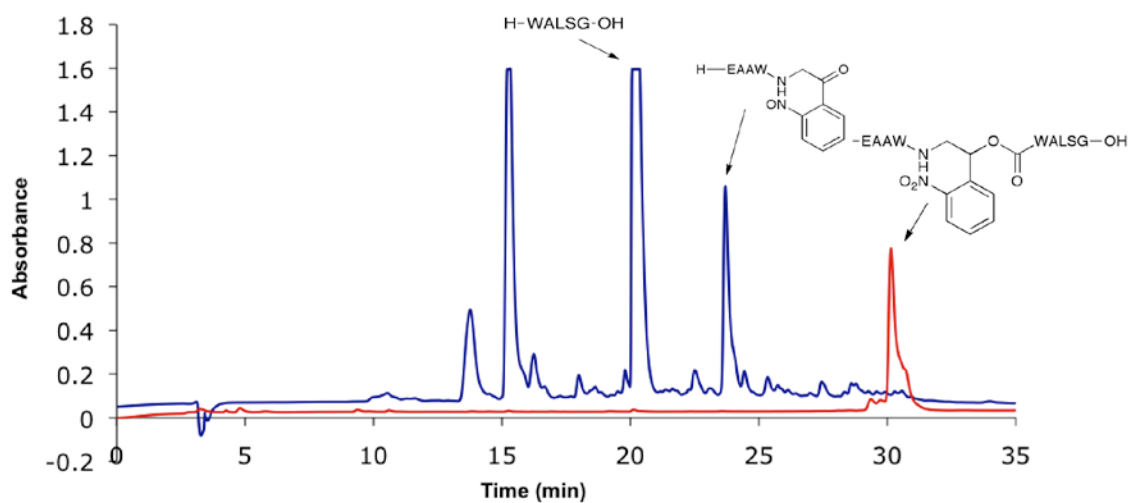

**Figure S6.** Photocleavage of **21h** to generate **22h** and **23h**.

**Representative analytical (C18) HPLC traces of peptides 23 to show purity after HPLC purification (peak from 3-4 min is a salt peak):**

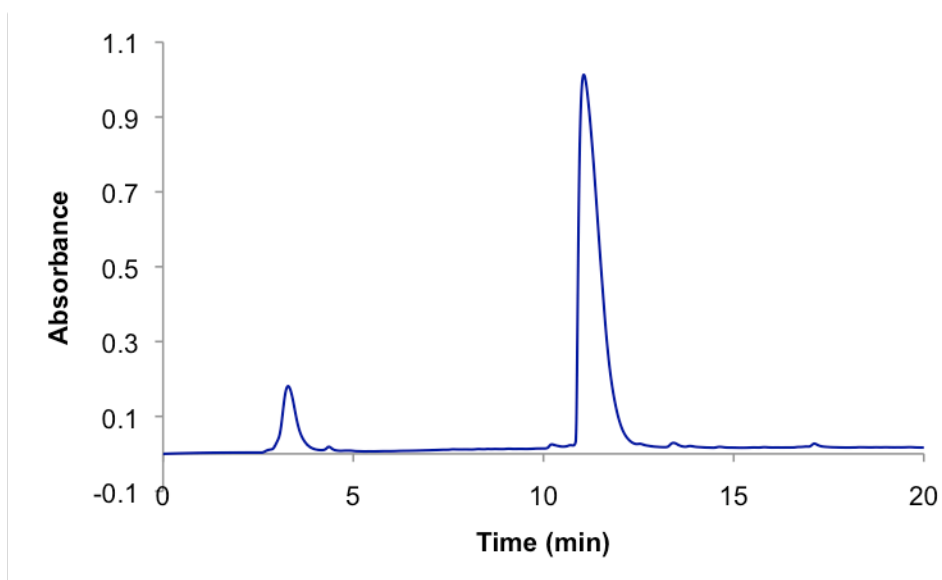

**Figure S7.** HPLC trace of **23a** after HPLC purification.

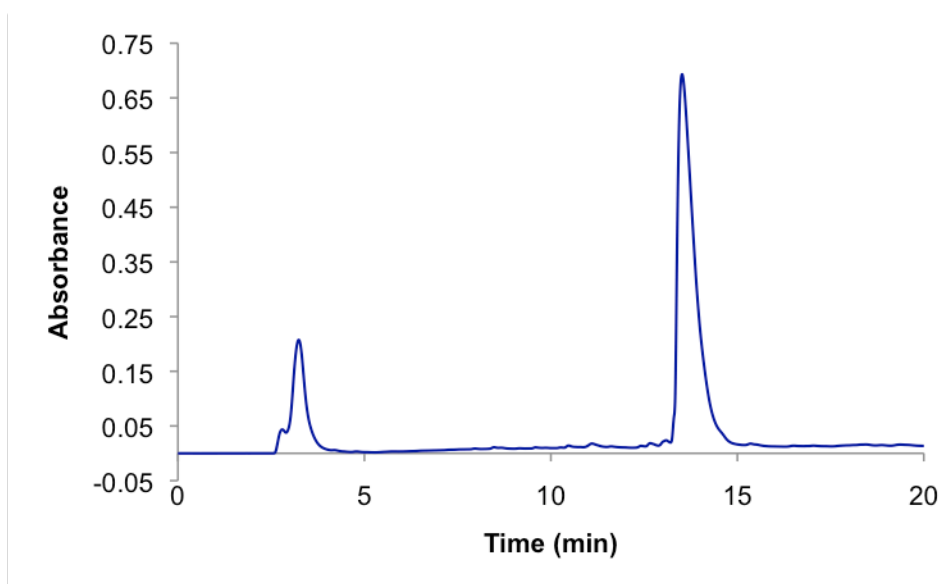

**Figure S8.** HPLC trace of **23b** after HPLC purification.

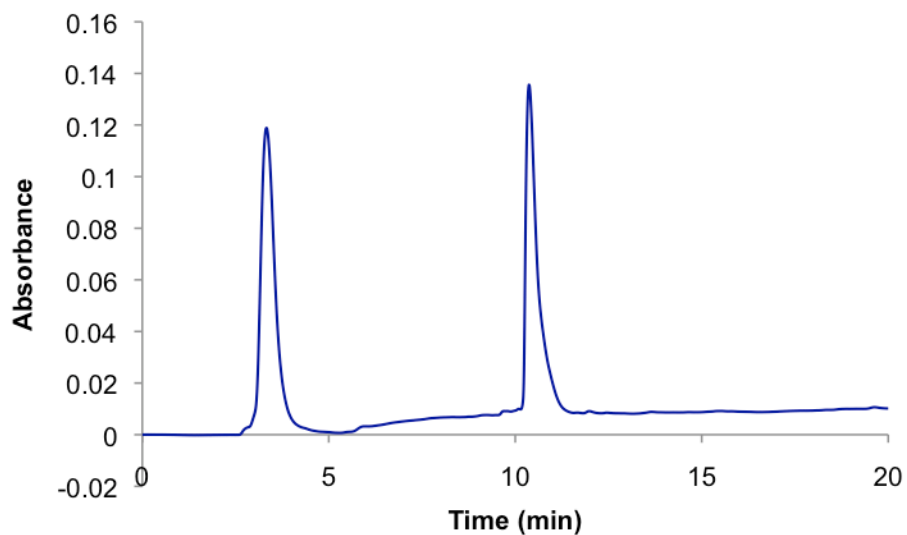

**Figure S9.** HPLC trace of **23c** after HPLC purification.

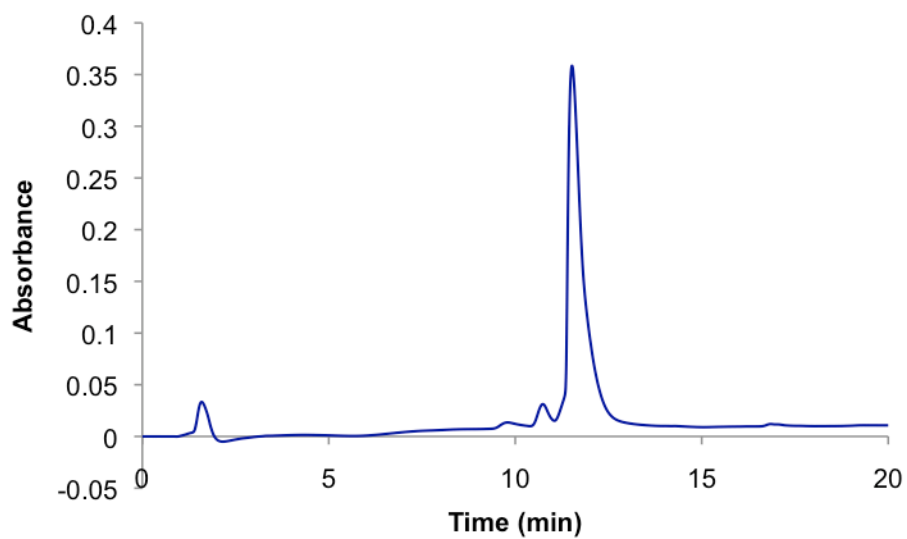

**Figure S10.** HPLC trace of **23d** after HPLC purification.

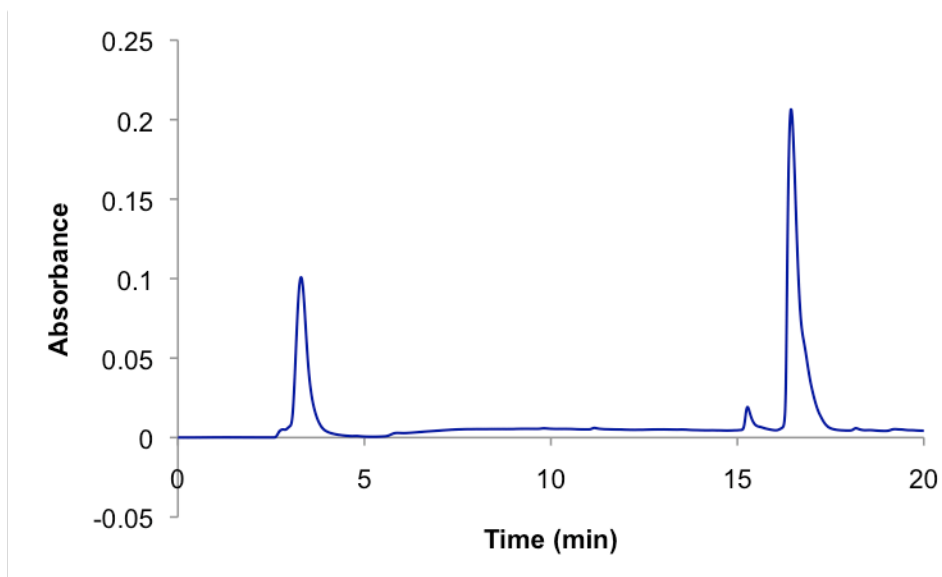

**Figure S12.** HPLC trace of **23e** after HPLC purification.

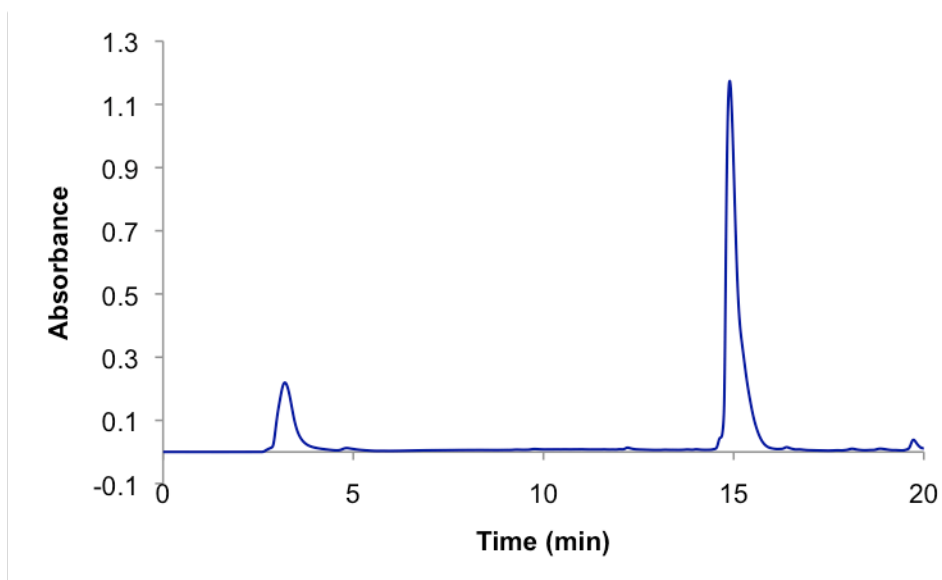

**Figure S14.** HPLC trace of **23f** after HPLC purification.

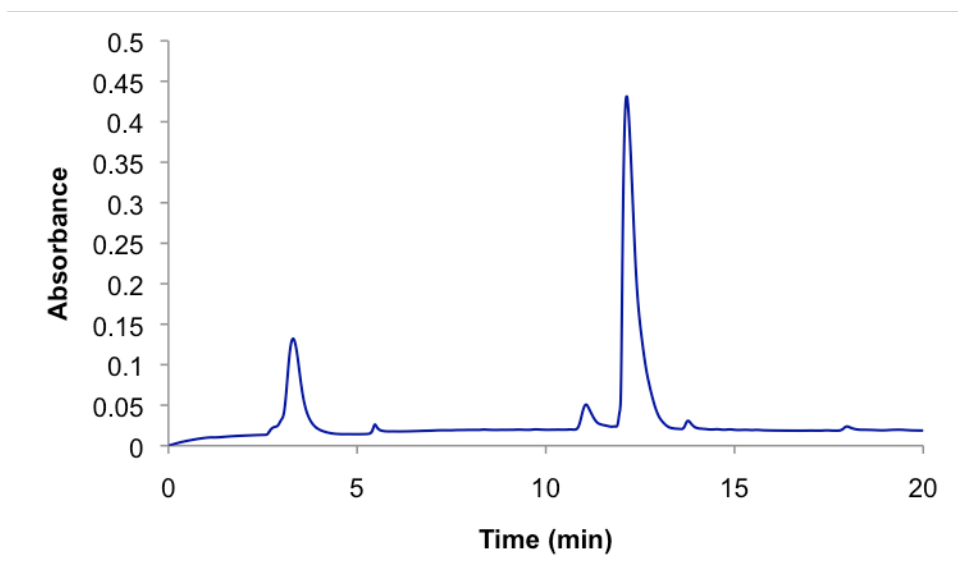

**Figure S15.** HPLC trace of **23g** after HPLC purification.

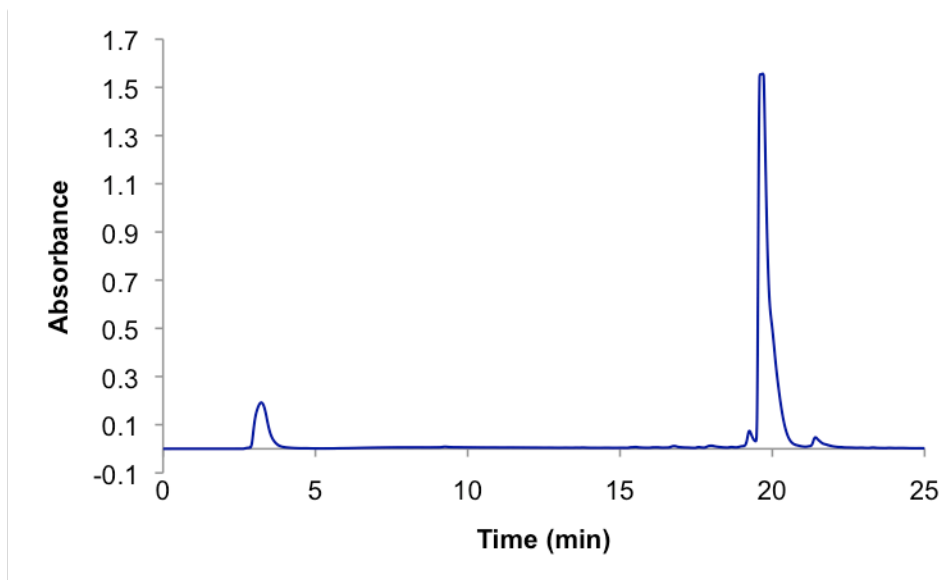

**Figure S16.** HPLC trace of **23h** after HPLC purification.

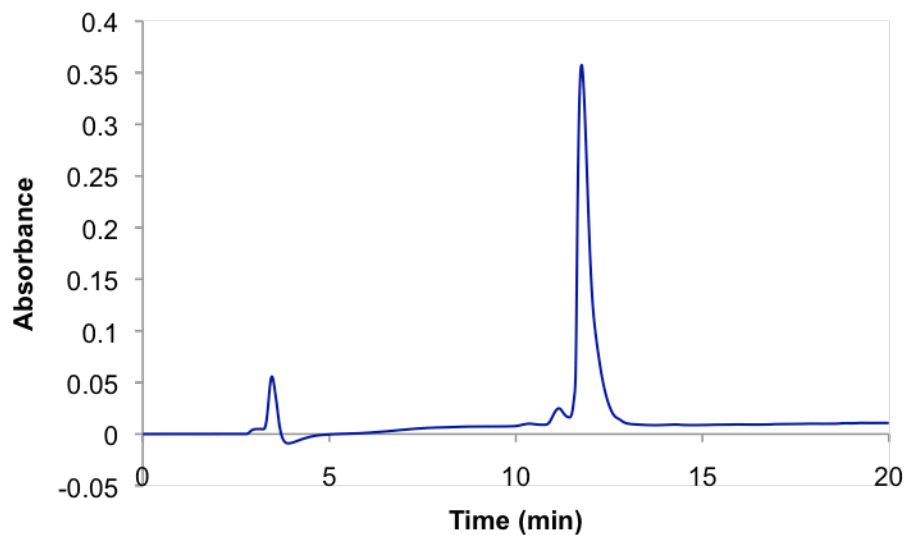

**Figure S17.** HPLC trace of **23i** after HPLC purification.

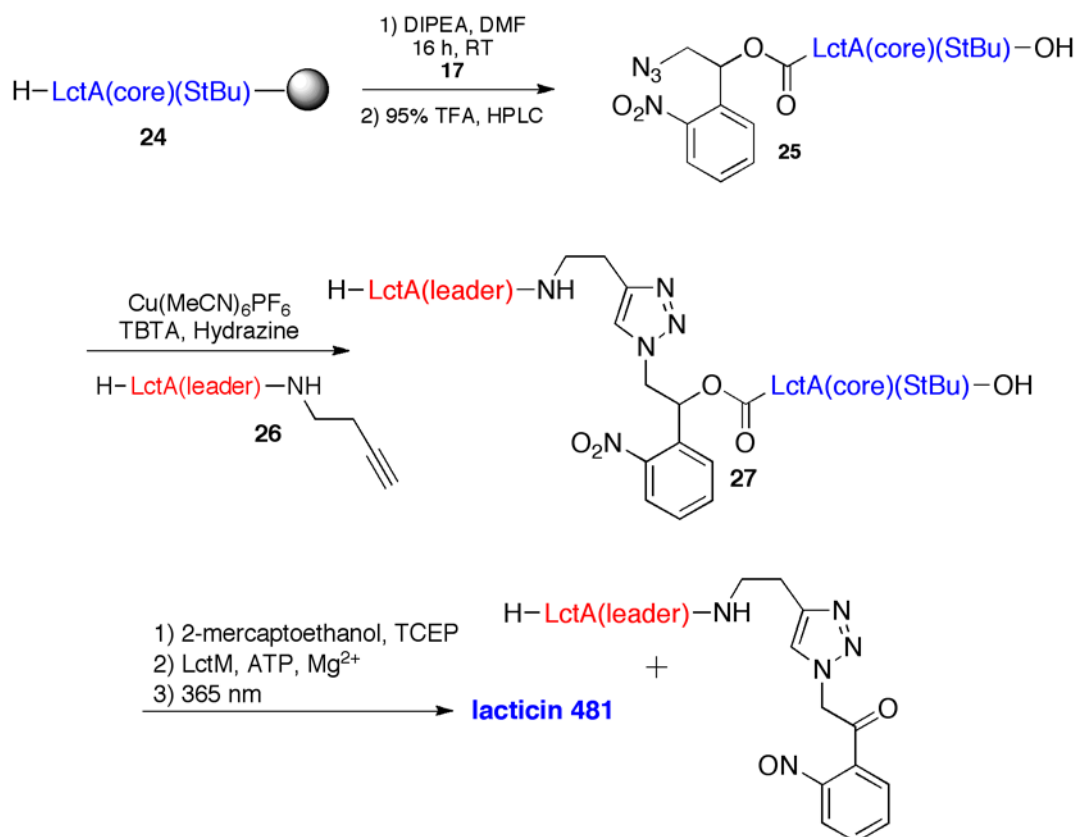

**Scheme S1.** Copper catalyzed azide/alkyne click reaction between LctA(leader) and LctA(core) followed by photolysis to afford lacticin 481.





piperidine (20% in DMF) with microwave irradiation (3 min, 30 W, 75 °C). After completion of the coupling of the final amino acid, the Fmoc group was not removed.

Peptide cleavage from resin was achieved by stirring the resin in a mixture of methylene chloride (8 mL), acetic acid (1 mL), and trifluoroethanol (1 mL) at room temperature for 1 h. (Note: peptide cleavage from 2-chlorotrityl chloride resin in 10% acetic acid does not cleave the amino acid protecting groups). At this time, the solid resin was removed by filtration, and the resulting solution was concentrated by rotary evaporation, and the AcOH was removed in an azeotrope with hexanes (3 × 8 mL). The peptide was then dissolved in THF (10 mL) and DMF (10 mL).

In a separate 50 mL round-bottomed flask was added but-3-yn-1-amine hydrochloride (0.5 mmol, 5 equiv) and N,N-diisopropylethylamine (0.5 mmol, 5 equiv) in THF (5 mL). To this solution was added a premixed solution of hydroxybenzotriazole (0.5 mmol, 5 equiv) and N,N-diisopropylcarbodiimide (0.5 mmol, 5 equiv) in 5 mL of THF and 5 mL of DMF. This mixture was then added to the flask containing the purified leader peptide and the reaction mixture was stirred for 12 h at room temperature. At this time, the solution was concentrated by rotary evaporation and a 20% piperidine/DMF solution (15 mL) was added to remove the terminal Fmoc group. The solution was stirred for 30 min followed by the removal of the piperidine and DMF under reduced pressure. The protecting groups were then removed from the amino acid side chains by adding a solution of TFA (7 mL), EDT (100 µL), TIPS (100 µL) and H<sub>2</sub>O (200 µL) and stirring the solution for 2 h at room temperature. The solution was concentrated by purging with a nitrogen stream and was precipitated with cold diethyl ether. The peptide was redissolved in a 1:1 solution of MeCN and H<sub>2</sub>O, lyophilized, and purified by preparative RP-HPLC on a Phenomenex C18 column (1.0 cm × 25.0 cm) employing a water-acetonitrile solvent system. The gradient used was from 2-80% solvent B in 45 min (solvent A = 0.1% TFA in H<sub>2</sub>O; solvent B = 80% acetonitrile in H<sub>2</sub>O, 0.086% TFA). Peptides were monitored by their absorbance at 220 nm. Fractions containing product as analyzed by MALDI-TOF MS were collected and lyophilized yielding product as a white powder.

**H—LctA(Leader)—Alkyne (26).** Preparative RP-HPLC; *R*<sub>t</sub> = 38.6-39.4 min. LRMS (MALDI): calcd C<sub>116</sub>H<sub>187</sub>N<sub>29</sub>O<sub>40</sub>, [M+H]<sup>+</sup> 2627.4, observed 2623.2

### Preparation of triazole-linked substrate (27).

Peptides **25** (2.0 mg, 0.76 µmol, 1 equiv) and **26** (1.5 mg, 0.76 µmol, 1 equiv) were placed in a 3 mL pear shaped flask equipped with a septum and the flask was sparged with N<sub>2</sub> for 3 min. The peptides were then dissolved in a degassed solution of 1:1 Tris buffer (5 mM, pH 7.0), and dioxane (1 mL) and DMSO (100 µL). In a separate 5 mL round-bottomed flask was placed TBTA (0.1 mg). This flask was sparged with N<sub>2</sub> for 3 min followed by the addition of 500 µL of a 1:1 mixture of Tris (5 mM, pH 7.0) and dioxane. To this solution was added tetrakis(MeCN)copper(I)hexafluorophosphate (40 µL of a 1.25 mg/mL aqueous solution). After brief stirring, an anhydrous hydrazine solution (20 µL of a 1% hydrazine solution in 1:1 Tris (5 mM, pH 7.0): dioxane) was added to the cupric solution followed by the addition of the peptide solution. The solution turned cloudy either the addition of hydrazine and the peptide solution. The solution was stirred under N<sub>2</sub> for 1.5 h and analyzed by MALDI-TOF MS after diluting with 50% MeCN. The lyophilized crude peptides were purified by preparative RP-HPLC on a

Phenomenex C18 column employing a water-acetonitrile solvent system. A linear gradient was used from 2% to 80% solvent B over 45 min (solvent A = 0.1% TFA in H<sub>2</sub>O; solvent B = 80% acetonitrile in H<sub>2</sub>O, 0.086% TFA). Fractions containing product (as analyzed by ESI-MS) were lyophilized yielding **27** (1.6 mg, 46%) as a white powder. **Triazole-linked LctA(leader)-LctA(core)(StBu) (27)**. Rt = 34.4-35.4 min LRMS (ESI): calcd C<sub>262</sub>H<sub>415</sub>N<sub>71</sub>O<sub>79</sub>S<sub>07</sub> [M+H]<sup>+</sup> 6131.85, observed 6131.6.

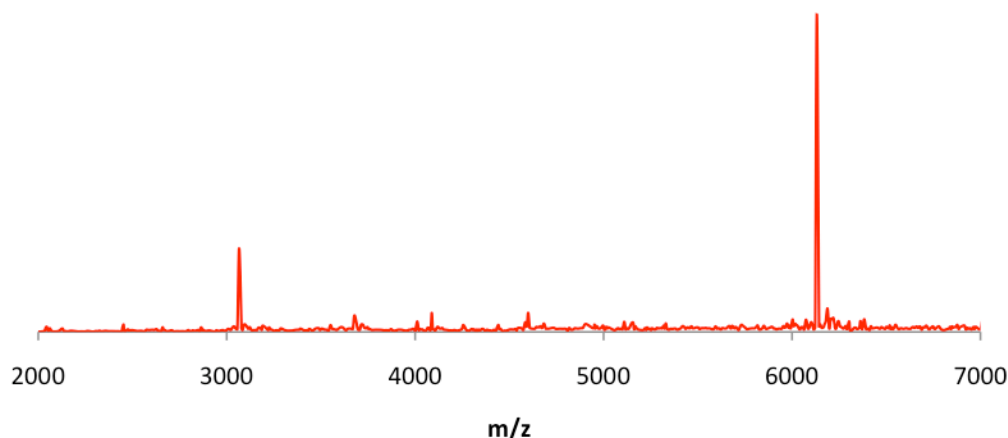

ESI-MS of cycloaddition product **27**. [M+H]<sup>+</sup> = 6131.6 m/z, [M+2H]<sup>2+</sup> = 3065.9 m/z.

#### Deprotection of StBu protected thiazole-linked substrate.

HPLC purified triazole linked LctA substrates ( $\approx$  3.0 mg) were dissolved in 40% MeCN, 60% Tris (37.5 mM, pH 8.3) (1.3 mL) and added to a 10 mL microwave flask. To this solution was added  $\beta$ -mercaptoethanol (150  $\mu$ L) and tris-(2-carboxyethyl) phosphine (6 mg). The reaction was heated to 60  $^{\circ}$ C for 30 min using a CEM Discover microwave reactor (100 W, 250 psi). The crude product was acidified (pH 1-2) with 1 M HCl and the lyophilized crude product was purified by preparative RP-HPLC on a C18 column employing a water-acetonitrile solvent system. The gradient used was from 2% to 80% solvent B in 45 min (solvent A = 0.1% TFA in H<sub>2</sub>O; solvent B = 80% acetonitrile in H<sub>2</sub>O, 0.086% TFA). Peptides were monitored by their absorbance at 220 nm. Fractions containing product (as analyzed by ESI-MS) were collected and lyophilized yielding deprotected product as a white powder.

**Triazole-linked LctA(Leader)-LctA(Core)** Rt = 35.0-36.5 min. LRMS (ESI): calcd C<sub>254</sub>H<sub>391</sub>N<sub>70</sub>O<sub>82</sub>S<sub>4</sub> [M+H]<sup>+</sup> 5867.75, observed 5867.3.

#### General Procedure for LctM assays.

His-LctM was overexpressed and purified as previously reported.<sup>3</sup> To a 1.6 mL eppendorf tube was added Tris HCl (100  $\mu$ L, 500 mM, pH 7.5), MgCl<sub>2</sub> (100  $\mu$ L, 100 mM), ATP (40  $\mu$ L, 50 mM), BSA (12.5  $\mu$ L, 2 mg/mL), and sterile deionized H<sub>2</sub>O (665.9  $\mu$ L). Triazole-linked LctA(Leader)-LctA(Core) substrate (40  $\mu$ L, 500  $\mu$ M in H<sub>2</sub>O) was then added followed by LctM (41.5  $\mu$ L, 34.1  $\mu$ M) and the solution was incubated for 12 h. At this time the solution was acidified to pH (1-2) with 5% TFA and the crude product

was purified by analytical RP-HPLC on a C4 column employing a water-acetonitrile solvent system. The gradient used was from 2% to 80% solvent B in 45 min. Fractions were analyzed by MALDI-TOF MS.

**LctM modified Triazole-linked LctA(Leader)-LctA(Core)**  $R_t = 34.4\text{-}35.2$  min. LRMS (ESI): calcd  $C_{254}H_{383}N_{70}O_{78}S_4$   $[M+H]^+$  5795.67 g/mol, observed 5795.0 g/mol.

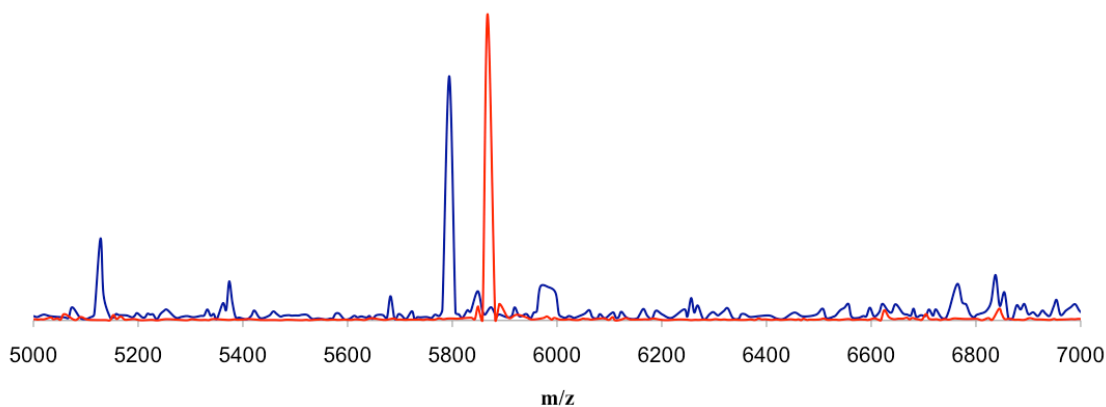

ESI-MS before (red) and after (blue) LctM assay.  $M = 5867.3$  m/z,  $M - 4 H_2O = 5795.0$  m/z.

**Photolysis of LctM-modified, triazole-linked LctA(Leader)-LctA(Core)**

Purified LctM modified peptide (<0.1 mg) in HPLC solvent was irradiated at 365 nm for 20 min. The product was analyzed by MALDI-TOF MS and ESI-MS.

**Lacticin 481.** LRMS (MALDI): calcd  $C_{126}H_{186}N_{40}O_{34}S_4$   $[M+H]^+$  2934.3, observed 2936.1

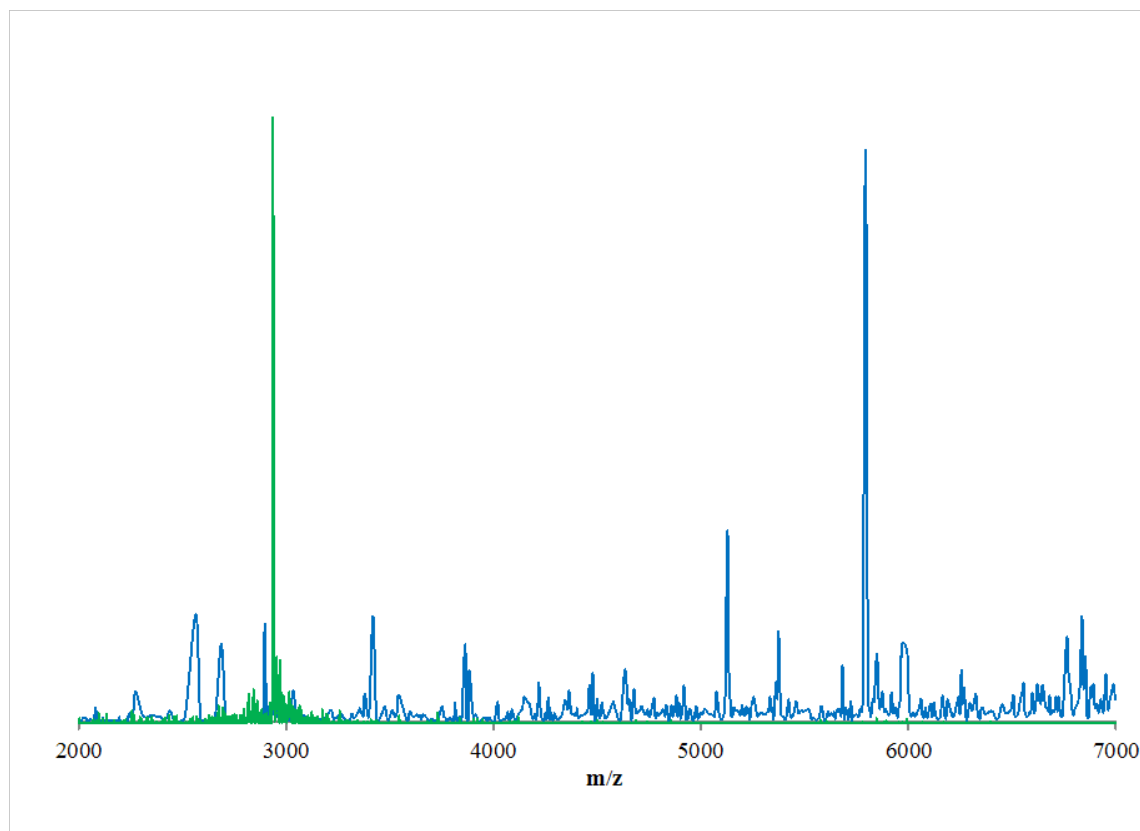

ESI-MS and MALDI-TOF-MS of LctM modified-triazole linked LctA(leader)-LctA(core) before (blue) and after (green) the photocleavage reaction.  $[M+H]^+$ <sub>before</sub> = 5795.0 m/z,  $[M+H]^+$ <sub>after</sub> = 2936.1 m/z.

#### References for Supporting Information.

1. Shimadzu and A. News, [www.shimadzu.com.br/analitica/aplicacoes/analisadores/ta/t97.pdf](http://www.shimadzu.com.br/analitica/aplicacoes/analisadores/ta/t97.pdf).
2. Y. O. You and W. A. van der Donk, *Biochemistry*, 2007, **46**, 5991-6000.
3. L. Xie, L. M. Miller, C. Chatterjee, O. Averin, N. L. Kelleher and W. A. van der Donk, *Science*, 2004, **303**, 679-681.
4. (a) M. R. Levengood, C. C. Kerwood, C. Chatterjee, W. A. van der Donk, *ChemBioChem*, 2009, **10**, 911; (b) M. R. Levengood, P. J. Knerr, T. J. Oman, W. A. van der Donk, *J. Am. Chem. Soc.*, 2009, **131**, 12024; (c) M. R. Levengood, W. A. van der Donk, *Bioorg. Med. Chem. Lett.*, 2008, **18**, 3025 (d) M. R. Levengood, G. C. Patton and W. A. van der Donk, *J. Am. Chem. Soc.*, 2007, **129**, 10314.
